# Supplementary material for: Utilization of soft pistachio hulls in Japanese quail diets for enhanced egg quality and yolk pigmentation
Source: PeerJ. 2025 Nov 21;13:e20204. doi: 10.7717/peerj.20204 (PMC12642913; doi:10.7717/peerj.20204)
Supplement: Supplemental Information 1 [file peerj-13-20204-s001.xlsx]

## Sheet: Egg Weight 1
Egg Weight, g
				Egg Weight g							Egg Performance Number										Egg Performance, %
Group	Group	Replicate	Number of Birds	7. Week	8. Week	9 Week	10 Week	11 Week	7-11 Week		Group	Replicate	Number of Birds	7. Week	8. Week	9 Week	10 Week	11 Week	7-11 Week		7. Week	8. Week	9 Week	10 Week	11 Week	7-11 Week
Control	Control	1	8	112.29	123.07	126.15	133.21	133.19	125.582		Control	1	8	24	48	49	42	50	213		42.8571	85.7143	87.5	75	89.2857	76.0714
Control	Control	2	8	111.77	121.48	119.95	134.99	135.11	124.66		Control	2	8	19	43	53	52	47	214		33.9286	76.7857	94.6429	92.8571	83.9286	76.4286
Control	Control	3	8	113.15	124.37	127.42	127.89	140.75	126.716		Control	3	8	16	35	51	50	50	202		28.5714	62.5	91.0714	89.2857	89.2857	72.1429
2% PH	2% PH	1	8	119.73	123.07	127.03	137.03	139.97	129.366		2% PH	1	8	17	34	50	43	51	195		30.3571	60.7143	89.2857	76.7857	91.0714	69.6429
2% PH	2% PH	2	8	63.33	125.64	126.02	136.85	139.17	118.202		2% PH	2	8	11	30	45	41	48	175		19.6429	53.5714	80.3571	73.2143	85.7143	62.5
2% PH	2% PH	3	8	30.48	127.38	126.53	138.95	147.49	114.166		2% PH	3	8	10	46	41	42	45	184		17.8571	82.1429	73.2143	75	80.3571	65.7143
4% PH	4% PH	1	8	113.01	121.73	125.86	125.18	134.73	124.102		4% PH	1	8	22	45	55	45	55	222		39.2857	80.3571	98.2143	80.3571	98.2143	79.2857
4% PH	4% PH	2	8	118.07	129.09	133.2	141.58	137.3	131.848		4% PH	2	8	19	36	51	45	50	201		33.9286	64.2857	91.0714	80.3571	89.2857	71.7857
4% PH	4% PH	3	8	114.49	132.88	128.04	137.8	143.41	131.324		4% PH	3	8	16	44	54	51	54	219		28.5714	78.5714	96.4286	91.0714	96.4286	78.2143
6% PH	6% PH	1	8	89.88	121.45	128.91	144.59	136.72	124.31		6% PH	1	8	10	35	53	43	50	191		17.8571	62.5	94.6429	76.7857	89.2857	68.2143
6% PH	6% PH	2	8	55.19	133.54	144.11	143.35	139.36	123.11		6% PH	2	8	7	32	52	50	51	192		12.5	57.1429	92.8571	89.2857	91.0714	68.5714
6% PH	6% PH	3	8	106.46	134.07	133.44	136.61	141.53	130.422		6% PH	3	8	12	48	56	52	51	219		21.4286	85.7143	100	92.8571	91.0714	78.2143
													Weekly Egg Performance, %
											Group	Replicate	7. Week	8. Week	9 Week	10 Week	11 Week	7-11 Week
											Control	1	42.8571	85.7143	87.5	75	89.2857	76.0714
												1	33.9286	76.7857	94.6429	92.8571	83.9286	76.4286
												1	28.5714	62.5	91.0714	89.2857	89.2857	72.1429
													35.119	75	91.0714	85.7143	87.5	74.881
											2% PH	2	30.3571	60.7143	89.2857	76.7857	91.0714	69.6429
												2	19.6429	53.5714	80.3571	73.2143	85.7143	62.5
												2	17.8571	82.1429	73.2143	75	80.3571	65.7143
													22.619	65.4762	80.9524	75	85.7143	65.9524
											4% PH	3	39.2857	80.3571	98.2143	80.3571	98.2143	79.2857
												3	33.9286	64.2857	91.0714	80.3571	89.2857	71.7857
												3	28.5714	78.5714	96.4286	91.0714	96.4286	78.2143
													33.9286	74.4048	95.2381	83.9286	94.6429	76.4286
											6 % PH	4	17.8571	62.5	94.6429	76.7857	89.2857	68.2143
												4	12.5	57.1429	92.8571	89.2857	91.0714	68.5714
												4	21.4286	85.7143	100	92.8571	91.0714	78.2143
													17.2619	68.4524	95.8333	86.3095	90.4762	71.6667

## Sheet: Egg Weight 2
Egg Weight, g
Group	Group	Tekerrür	Week 7	Week 8	Week 9	Week 10	Week 11	Average Week 7-11
Control	1	1	12.04	12.78	12.79	12.91	12.87	12.678
Control	1	1	12.66	12.9	12.29	13.82	13.14	12.962
Control	1	1	11.82	13.52	13.25	13.2	14.93	13.344
Control	1	1	10.13	13.84	12.39	13.84	13.87	12.814
Control	1	1	10.91	11.58	11.15	13.69	13.54	12.174
Control	1	1	9.34	13.09	12.43	11.94	12.8	11.92
Control	1	1	12.55	9.85	12.77	14.39	13.22	12.556
Control	1	1	11.5	11.18	13.5	15.25	14.72	13.23
Control	1	1	11.3	11.4	13.57	12.44	13.21	12.384
Control	1	1	10.04	12.93	12.01	11.73	10.89	11.52
Control	1	2	11.52	12.79	12.53	13.88	13.27	12.798
Control	1	2	12.2	12.71	12.92	14.15	13.18	13.032
Control	1	2	10.43	12.5	13.13	12.65	13.15	12.372
Control	1	2	11.15	11.2	12.84	10.12	13.14	11.69
Control	1	2	9	12.66	12.51	12.83	12.89	11.978
Control	1	2	12.1	12.17	12.57	15.84	16.11	13.758
Control	1	2	10.55	11.7	10.85	15.23	13.17	12.3
Control	1	2	11.22	12.6	11.05	13.52	13.31	12.34
Control	1	2	12	11.42	12.63	13.49	16.4	13.188
Control	1	2	11.6	11.73	8.92	13.28	10.49	11.204
Control	1	3	11.3	12.62	13.43	12.99	14.9	13.048
Control	1	3	11.85	12.19	13.19	14.13	14.8	13.232
Control	1	3	11.8	9.93	12.61	11.85	12.33	11.704
Control	1	3	11.67	12.82	12.73	13.17	14.4	12.958
Control	1	3	9.69	12.17	13.4	11.54	14.13	12.186
Control	1	3	11.32	12.8	9.95	12.78	14.71	12.312
Control	1	3	11.48	13.2	12.56	14.56	13.15	12.99
Control	1	3	12.24	12.09	14.32	13.78	14.23	13.332
Control	1	3	11.75	13.22	11.54	11.79	13.5	12.36
Control	1	3	10.05	13.33	13.69	11.3	14.6	12.594
2%PH	2	1	12.55	12.77	13.03	14.39	13.41	13.23
2%PH	2	1	12.67	14.05	13.16	14.5	15.15	13.906
2%PH	2	1	12.12	9.44	13.17	12.27	13.9	12.18
2%PH	2	1	12.75	12.48	11.7	13	14.94	12.974
2%PH	2	1	11.95	13.7	13.18	13.25	15.33	13.482
2%PH	2	1	11.94	11.46	13.75	14.82	12.05	12.804
2%PH	2	1	12.22	12.45	12.68	14.21	14.8	13.272
2%PH	2	1	11.25	11.92	11.47	13.81	12.99	12.288
2%PH	2	1	12.42	12.41	12.58	12.91	13.7	12.804
2%PH	2	1	9.86	12.39	12.31	13.87	13.7	12.426
2%PH	2	2	12.79	12.22	12.45	12.78	14.65	12.978
2%PH	2	2	11.25	13.42	12.31	14.1	14.74	13.164
2%PH	2	2	8.23	10.87	12.54	11.74	14.52	11.58
2%PH	2	2	10.08	13.17	12.35	13.13	13.22	12.39
2%PH	2	2	10.2	12.43	13.07	14.26	13.3	12.652
2%PH	2	2	10.78	10.81	11.82	14.57	13.03	12.202
2%PH	2	2		12.58	12.33	14.14	15	13.5125
2%PH	2	2		12.87	11.92	12.78	13.55	12.78
2%PH	2	2		14.61	14.34	14.72	13.56	14.3075
2%PH	2	2		12.66	12.89	14.63	13.6	13.445
2%PH	2	3	11.05	12.12	10.24	12.86	13.6	11.974
2%PH	2	3	9.55	11.99	11.86	13.13	15.7	12.446
2%PH	2	3	9.88	13.08	14.31	12.31	17.89	13.494
2%PH	2	3		13.28	14.98	12.8	13.9	13.74
2%PH	2	3		12.83	12.64	13.58	15.78	13.7075
2%PH	2	3		12.3	12.74	13.22	13.8	13.015
2%PH	2	3		14.16	12.48	16.29	13.69	14.155
2%PH	2	3		12.72	12.55	14.2	14.15	13.405
2%PH	2	3		12.89	11.95	14.87	15.43	13.785
2%PH	2	3		12.01	12.78	15.69	13.55	13.5075
4%PH	3	1	9.16	12.42	13.59	14.98	14.88	13.006
4%PH	3	1	11.32	12.21	11.2	12.78	14.85	12.472
4%PH	3	1	11.5	10.88	9.9	11.64	12.75	11.334
4%PH	3	1	9.85	12.02	11.96	11.96	12.3	11.618
4%PH	3	1	11.5	12.12	14.34	11.55	12.7	12.442
4%PH	3	1	13.08	12.15	12.39	12.3	14.8	12.944
4%PH	3	1	13.1	12.38	14.04	14.89	13	13.482
4%PH	3	1	10.9	11.27	13.73	10.99	14.5	12.278
4%PH	3	1	11.1	12	11.1	11.38	13.25	11.766
4%PH	3	1	11.5	14.28	13.61	12.71	11.7	12.76
4%PH	3	2	12.75	13.4	13.27	14.41	14.77	13.72
4%PH	3	2	10.87	13.32	14.09	13.77	14.2	13.25
4%PH	3	2	12.4	13.03	14.99	14.6	13.25	13.654
4%PH	3	2	10.9	13.05	13.66	15.14	12	12.95
4%PH	3	2	12.04	12.06	12.98	13.09	16.1	13.254
4%PH	3	2	10.36	12.24	12.4	14.42	14.2	12.724
4%PH	3	2	12.05	12.69	13.44	14.39	13.92	13.298
4%PH	3	2	12.6	12.63	13.19	14.42	12.74	13.116
4%PH	3	2	11.6	12.93	13.6	12.28	13.9	12.862
4%PH	3	2	12.5	13.74	11.58	15.06	12.22	13.02
4%PH	3	3	12.3	13.64	12.84	14.09	15.16	13.606
4%PH	3	3	12.1	12.97	13.03	12.1	15.7	13.18
4%PH	3	3	10.7	12.98	13.12	13.44	12.1	12.468
4%PH	3	3	10.99	13.41	14.96	13.38	16.4	13.828
4%PH	3	3	11.79	14.18	10.39	14.73	13.3	12.878
4%PH	3	3	12.28	14.69	11.59	14.93	14.5	13.598
4%PH	3	3	11.11	14.26	13.16	13.89	14.8	13.444
4%PH	3	3	10.14	12.77	11.57	14.14	15.6	12.844
4%PH	3	3	12.73	10.88	13.83	13.36	13.8	12.92
4%PH	3	3	10.35	13.1	13.55	13.74	12.05	12.558
6%PH	4	1	11.5	11.73	12.49	17.38	14.1	13.44
6%PH	4	1	10.92	13.1	14.08	13.37	12.82	12.858
6%PH	4	1	9.88	11.13	12.24	13.96	13.6	12.162
6%PH	4	1	11.02	13.14	12.89	14.79	15.1	13.388
6%PH	4	1	12.1	13.54	12.19	14.3	13.85	13.196
6%PH	4	1	10.11	10.74	12.7	14.2	13.35	12.22
6%PH	4	1	11.7	11.67	14.93	13.4	13.2	12.98
6%PH	4	1	12.65	11.66	11.91	15.45	14.1	13.154
6%PH	4	1		12.85	13.18	14.85	13.1	13.495
6%PH	4	1		11.89	12.3	12.89	13.5	12.645
6%PH	4	2	12.38	14.37	13.93	14.6	15.23	14.102
6%PH	4	2	10.5	14	14.32	13.9	13.28	13.2
6%PH	4	2	10.65	12.32	17.88	13.77	12.8	13.484
6%PH	4	2	11.55	13.5	14.76	14.44	13.6	13.57
6%PH	4	2	10.11	12.93	14.16	12.57	13.2	12.594
6%PH	4	2		12.63	13.97	15.36	12.7	13.665
6%PH	4	2		12.67	13.95	13.91	15.4	13.9825
6%PH	4	2		14.1	13.45	14.65	14.7	14.225
6%PH	4	2		13.29	13.87	16	13.1	14.065
6%PH	4	2		13.73	13.82	14.15	15.35	14.2625
6%PH	4	3	12.05	13.09	12.73	13.24	13.35	12.892
6%PH	4	3	12.44	13.53	13.93	13.21	13.1	13.242
6%PH	4	3	13.32	14.06	12.71	13.31	15.1	13.7
6%PH	4	3	11.85	13.98	14.1	14.02	13	13.39
6%PH	4	3	11.7	14	13.76	14	14.1	13.512
6%PH	4	3	10.87	12.06	13.19	13.84	13.6	12.712
6%PH	4	3	12.6	13.92	11.81	14.14	14.48	13.39
6%PH	4	3	11.88	13.23	13.99	13.29	14.85	13.448
6%PH	4	3	9.75	13.25	12.76	13.03	14.5	12.658
6%PH	4	3		12.95	14.46	14.53	15.45	14.3475

## Sheet: Live Weight 1
Egg Period Live Weight , g				2,12.21		30,12.21
Grup	Group	Repl	N	Week 7	N	Week 11
Control	1	1	9	358	8	376
Control	1	1	9	344	8	366
Control	1	1	9	339	8	351
Control	1	1	9	335	8	351
Control	1	1	9	321	8	342
Control	1	1	9	314	8	337
Control	1	1	9	301	8	312
Control	1	1	9	263	8	238
Control	1	1	9	229	8
Control	1	2	9	368	8	401
Control	1	2	9	353	8	382
Control	1	2	9	343	8	374
Control	1	2	9	340	8	356
Control	1	2	9	326	8	355
Control	1	2	9	323	8	350
Control	1	2	9	312	8	256
Control	1	2	9	278	8	226
Control	1	2	9	260	8
Control	1	3	9	358	8	377
Control	1	3	9	348	8	351
Control	1	3	9	334	8	350
Control	1	3	9	319	8	342
Control	1	3	9	311	8	333
Control	1	3	9	296	8	312
Control	1	3	9	285	8	296
Control	1	3	9	281	8	280
Control	1	3	9	272	8
PH 2%	2	1	9	371	8	414
PH 2%	2	1	9	347	8	379
PH 2%	2	1	9	346	8	366
PH 2%	2	1	9	344	8	364
PH 2%	2	1	9	344	8	345
PH 2%	2	1	9	342	8	344
PH 2%	2	1	9	319	8	336
PH 2%	2	1	9	278	8	302
PH 2%	2	1	9	277	8
PH 2%	2	2	9	351	8	364
PH 2%	2	2	9	350	8	356
PH 2%	2	2	9	325	8	345
PH 2%	2	2	9	320	8	344
PH 2%	2	2	9	305	8	343
PH 2%	2	2	9	282	8	334
PH 2%	2	2	9	265	8	325
PH 2%	2	2	9	263	8	278
PH 2%	2	2	9	230	8
PH 2%	2	3	9	396	8	413
PH 2%	2	3	9	391	8	402
PH 2%	2	3	9	374	8	395
PH 2%	2	3	9	372	8	382
PH 2%	2	3	9	370	8	380
PH 2%	2	3	9	358	8	356
PH 2%	2	3	9	328	8	356
PH 2%	2	3	9	319	8	332
PH 4%	2	3	9	313	8
PH 4%	3	1	9	348	8	346
PH 4%	3	1	9	343	8	344
PH 4%	3	1	9	321	8	340
PH 4%	3	1	9	319	8	323
PH 4%	3	1	9	306	8	320
PH 4%	3	1	9	305	8	316
PH 4%	3	1	9	305	8	260
PH 4%	3	1	9	260	8	199
PH 4%	3	1	9	233	8
PH 4%	3	2	9	380	8	383
PH 4%	3	2	9	354	8	364
PH 4%	3	2	9	352	8	354
PH 4%	3	2	9	338	8	349
PH 4%	3	2	9	332	8	336
PH 4%	3	2	9	329	8	333
PH 4%	3	2	9	321	8	325
PH 4%	3	2	9	290	8	250
PH 4%	3	2	9	265	8
PH 4%	3	3	9	387	8	382
PH 4%	3	3	9	383	8	370
PH 4%	3	3	9	363	8	360
PH 4%	3	3	9	358	8	339
PH 4%	3	3	9	335	8	317
PH 4%	3	3	9	316	8	312
PH 4%	3	3	9	303	8	307
PH 4%	3	3	9	297	8	298
PH 4%	3	3	9	276	8
PH 6%	4	1	9	414	8	455
PH 6%	4	1	9	359	8	360
PH 6%	4	1	9	354	8	356
PH 6%	4	1	9	351	8	356
PH 6%	4	1	9	351	8	352
PH 6%	4	1	9	339	8	345
PH 6%	4	1	9	292	8	336
PH 6%	4	1	9	286	8	303
PH 6%	4	1	9	274	8
PH 6%	4	2	9	367	8	395
PH 6%	4	2	9	356	8	371
PH 6%	4	2	9	351	8	361
PH 6%	4	2	9	342	8	352
PH 6%	4	2	9	329	8	349
PH 6%	4	2	9	313	8	348
PH 6%	4	2	9	304	8	312
PH 6%	4	2	9	283	8	305
PH 6%	4	2	9	273	8
PH 6%	4	3	9	353	8	375
PH 6%	4	3	9	348	8	365
PH 6%	4	3	9	348	8	365
PH 6%	4	3	9	347	8	348
PH 6%	4	3	9	344	8	333
PH 6%	4	3	9	342	8	333
PH 6%	4	3	9	330	8	328
PH 6%	4	3	9	318	8	312
PH 6%	4	3	9	317	8

## Sheet: Live Weight 2
Egg Period Live Weight , g				2,12.21		30,12.21
Grup	Group	Tekerrür	N sayısı	Week 7	N sayısı	Week 11
Control	1	1	9	358	8	376
Control	1	1	9	344	8	366
Control	1	1	9	339	8	351
Control	1	1	9	335	8	351
Control	1	1	9	321	8	342
Control	1	1	9	314	8	337
Control	1	1	9	301	8	312
Control	1	1	9	263	8	238
Control	1	1	9	229	8
Control	1	2	9	368	8	401
Control	1	2	9	353	8	382
Control	1	2	9	343	8	374
Control	1	2	9	340	8	356
Control	1	2	9	326	8	355
Control	1	2	9	323	8	350
Control	1	2	9	312	8	256
Control	1	2	9	278	8	226
Control	1	2	9	260	8
Control	1	3	9	358	8	377
Control	1	3	9	348	8	351
Control	1	3	9	334	8	350
Control	1	3	9	319	8	342
Control	1	3	9	311	8	333
Control	1	3	9	296	8	312
Control	1	3	9	285	8	296
Control	1	3	9	281	8	280
Control	1	3	9	272	8
PH 2%	2	1	9	371	8	414
PH 2%	2	1	9	347	8	379
PH 2%	2	1	9	346	8	366
PH 2%	2	1	9	344	8	364
PH 2%	2	1	9	344	8	345
PH 2%	2	1	9	342	8	344
PH 2%	2	1	9	319	8	336
PH 2%	2	1	9	278	8	302
PH 2%	2	1	9	277	8
PH 2%	2	2	9	351	8	364
PH 2%	2	2	9	350	8	356
PH 2%	2	2	9	325	8	345
PH 2%	2	2	9	320	8	344
PH 2%	2	2	9	305	8	343
PH 2%	2	2	9	282	8	334
PH 2%	2	2	9	265	8	325
PH 2%	2	2	9	263	8	278
PH 2%	2	2	9	230	8
PH 2%	2	3	9	396	8	413
PH 2%	2	3	9	391	8	402
PH 2%	2	3	9	374	8	395
PH 2%	2	3	9	372	8	382
PH 2%	2	3	9	370	8	380
PH 2%	2	3	9	358	8	356
PH 2%	2	3	9	328	8	356
PH 2%	2	3	9	319	8	332
PH 4%	2	3	9	313	8
PH 4%	3	1	9	348	8	346
PH 4%	3	1	9	343	8	344
PH 4%	3	1	9	321	8	340
PH 4%	3	1	9	319	8	323
PH 4%	3	1	9	306	8	320
PH 4%	3	1	9	305	8	316
PH 4%	3	1	9	305	8	260
PH 4%	3	1	9	260	8	199
PH 4%	3	1	9	233	8
PH 4%	3	2	9	380	8	383
PH 4%	3	2	9	354	8	364
PH 4%	3	2	9	352	8	354
PH 4%	3	2	9	338	8	349
PH 4%	3	2	9	332	8	336
PH 4%	3	2	9	329	8	333
PH 4%	3	2	9	321	8	325
PH 4%	3	2	9	290	8	250
PH 4%	3	2	9	265	8
PH 4%	3	3	9	387	8	382
PH 4%	3	3	9	383	8	370
PH 4%	3	3	9	363	8	360
PH 4%	3	3	9	358	8	339
PH 4%	3	3	9	335	8	317
PH 4%	3	3	9	316	8	312
PH 4%	3	3	9	303	8	307
PH 4%	3	3	9	297	8	298
PH 4%	3	3	9	276	8
PH 6%	4	1	9	414	8	455
PH 6%	4	1	9	359	8	360
PH 6%	4	1	9	354	8	356
PH 6%	4	1	9	351	8	356
PH 6%	4	1	9	351	8	352
PH 6%	4	1	9	339	8	345
PH 6%	4	1	9	292	8	336
PH 6%	4	1	9	286	8	303
PH 6%	4	1	9	274	8
PH 6%	4	2	9	367	8	395
PH 6%	4	2	9	356	8	371
PH 6%	4	2	9	351	8	361
PH 6%	4	2	9	342	8	352
PH 6%	4	2	9	329	8	349
PH 6%	4	2	9	313	8	348
PH 6%	4	2	9	304	8	312
PH 6%	4	2	9	283	8	305
PH 6%	4	2	9	273	8
PH 6%	4	3	9	353	8	375
PH 6%	4	3	9	348	8	365
PH 6%	4	3	9	348	8	365
PH 6%	4	3	9	347	8	348
PH 6%	4	3	9	344	8	333
PH 6%	4	3	9	342	8	333
PH 6%	4	3	9	330	8	328
PH 6%	4	3	9	318	8	312
PH 6%	4	3	9	317	8

## Sheet: Egg Traits 1
Egg Traits				01,12.2021											Shell Thickness					30,12.2021												Shell Thickness
Group	Group	Replicate	Number	Egg Weight	Width	Length	Yellow Diameter	Yellow height	Egg white with	Egg White Length	Egg White Height	Yellow Weight	Yellow Color	shell weight	Blunt	Pointed	Medium	Shell Thickness		Egg Weight	Width	Length	Yellow Diameter	Yellow height	Egg white with	Egg White Length	Egg White Height	Yellow Weight	Yellow Color	shell weight	Blunt	Pointed	Medium	Shell Thickness
Control	1	1	1	12.04	26.39	32.36	22.51	12.08	33.08	42.42	6.45	3.19	11	1.21	0.192	0.22	0.211	0.207667		12.87	26.21	33.25	26.65	12.78	35.7	50.4	6.45	3.93	8	1.27	0.215	0.289	0.21	0.238
Control	1	1	2	12.66	25.96	33.17	22.8	12.1	34.77	41.5	8.18	3.85	10	1.23	0.242	0.197	0.228	0.222333		13.14	26.46	34.43	25.3	11.7	39.1	46.8	5.48	4.75	8	0.96	0.228	0.304	0.217	0.249667
Control	1	1	3	11.82	26.18	30.88	22.61	13.32	33.88	40.35	6.15	3.16	9	1.16	0.386	0.395	0.386	0.389		14.93	27.73	34.75	26.7	12.75	44.76	57.91	6.45	4.58	8	1.24	0.22	0.315	0.211	0.248667
Control	1	1	4	10.13	24.32	30.57	21.2	12.4	36.65	48.2	5.4	3.1	11	0.96	0.337	0.285	0.271	0.297667		13.87	27.55	33.72	25.55	12.28	38.24	45.3	7.35	4.14	9	1.48	0.245	0.305	0.26	0.27
Control	1	1	5	10.91	24.93	31.75	21.86	12.07	32.64	47.1	7.15	2.9	11	1.03	0.331	0.368	0.257	0.318667		13.54	26.53	34.95	24.5	12.3	31.92	42.75	6.8	3.99	8	1.23	0.24	0.37	0.22	0.276667
Control	1	1	6	9.34	23.66	30.11	21.69	11.23	34.86	43.61	5.35	2.9	9	0.99	0.268	0.31	0.242	0.273333		12.8	26.17	34.7	24.35	12.55	34.8	49.4	7.15	3.5	8	1.18	0.22	0.28	0.23	0.243333
Control	1	1	7	12.55	26.55	33.45	23.5	12.76	35.62	43.81	6.77	3.81	10	1.11	0.265	0.244	0.246	0.251667		12.72	26.94	32.9	24.58	11.74	34.79	41.45	7.1	3.71	8	1.23	0.214	0.265	0.215	0.231333
Control	1	1	8	11.5	25.58	31.46	24.46	12.43	31.39	39.77	6.4	3.39	10	1.14	0.249	0.268	0.272	0.263		14.72	27.1	36.9	26.81	12.73	40.95	41.91	7.45	4.7	8	1.35	0.23	0.281	0.229	0.246667
Control	1	1	9	11.3	24.67	33.97	22.78	10.92	33.4	48.65	6.08	3.12	11	0.96	0.265	0.361	0.218	0.281333		13.21	26.88	34.25	25.73	13.1	39.17	50.37	5.68	4.45	8	1.43	0.236	0.33	0.25	0.272
Control	1	1	10	11.04	25.72	31.91	20.4	11.8	32.06	40.86	6.54	2.96	9	0.83	0.324	0.205	0.272	0.267		10.89	25.43	31.04	24.52	12.5	32.31	39.58	6.75	3.55	8	1.17	0.226	0.265	0.225	0.238667
Control	1	2	11	11.52	25.31	33.12	21.9	12.1	33.82	48.8	6.8	3.1	10	0.99	0.293	0.224	0.292	0.269667		13.27	27.14	33.78	25.98	11.99	38.8	47.65	6.35	4.06	8	1.16	0.227	0.288	0.22	0.245
Control	1	2	12	12.2	26.32	32.35	22.88	12.96	35.2	44.47	6.44	3.65	10	0.98	0.224	0.329	0.208	0.253667		13.18	26.42	33.92	24.86	11.4	40.4	47.87	6.42	4.5	8	1.35	0.225	0.323	0.221	0.256333
Control	1	2	13	10.43	25.08	30.21	21.26	11.64	31.9	39.16	6.2	3.11	11	1.11	0.313	0.3	0.269	0.294		13.15	26.53	34.14	25.82	11.94	40.7	57.8	5.95	4.1	8	1.13	0.21	0.245	0.198	0.217667
Control	1	2	14	11.15	25.52	31.1	23.86	12.1	32.99	45.71	6.1	3.14	11	0.95	0.326	0.257	0.235	0.272667		13.14	26.28	34.63	26.66	12.2	39.25	55.8	5.7	4.1	8	1.09	0.219	0.234	0.198	0.217
Control	1	2	15	9	23.88	25.6	20.46	10.46	28.42	35.58	5.86	2.3	11	0.91	0.263	0.281	0.21	0.251333		12.89	26.6	33.7	25.85	12.55	39.21	48.55	5.7	4.45	8	1.14	0.195	0.29	0.194	0.226333
Control	1	2	16	12.1	25.55	33.51	23.11	10.33	33.79	43.27	6.55	3.33	13	0.77	0.181	0.277	0.209	0.222333		16.11	28.27	37.3	26.93	12.94	40.9	51.1	6.78	4.68	8	1.36	0.19	0.33	0.22	0.246667
Control	1	2	17	10.55	27.73	31.27	21.27	11.27	38.32	43.8	6.1	2.84	10	1.01	0.313	0.286	0.289	0.296		13.17	26.9	33.75	25.1	12.3	34.5	45.58	6.12	4.18	9	1.21	0.228	0.318	0.224	0.256667
Control	1	2	18	11.22	25.13	32.77	25.47	10.95	34.28	43.38	6.37	3.55	11	1.08	0.267	0.336	0.242	0.281667		13.31	26.98	34.12	27.65	12.3	37.98	50.4	7.95	4.19	9	1.14	0.198	0.305	0.205	0.236
Control	1	2	19	12	26.03	32.47	22.62	11.56	38.19	45.1	6.94	3.22	12	1.14	0.317	0.325	0.234	0.292		16.4	28.25	37.45	27.1	13.1	48.45	54.56	8.2	4.58	8	1.25	0.19	0.32	0.207	0.239
Control	1	2	20	11.6	25.63	32.27	24.83	11.28	34.72	43.07	5.88	3.36	12	1.07	0.289	0.335	0.249	0.291		10.49	24.7	34.72	23.81	10.5	38.27	50.4	4.52	3.3	8	1.09	0.245	0.284	0.229	0.252667
Control	1	3	21	11.3	25.49	31.75	21.58	12.56	34.38	45.05	6.91	3.15	13	1.11	0.225	0.233	0.234	0.230667		14.9	27.77	35.34	25.94	12.87	40.14	51.95	6.21	4.51	8	1.26	0.205	0.22	0.218	0.214333
Control	1	3	22	11.85	25.37	33.8	22.12	12.38	33.69	44.55	5.85	3.12	12	1.01	0.224	0.208	0.211	0.214333		14.8	27.58	36.25	26.56	13.7	42.9	58.1	7.27	4.4	8	1.24	0.186	0.21	0.205	0.200333
Control	1	3	23	11.8	24.93	32.24	22.14	10.67	30.98	42.35	6.62	3.4	11	1.03	0.231	0.249	0.216	0.232		12.3	26.44	32.6	26.27	10.9	37.83	52.55	5.9	3.98	9	0.96	0.215	0.31	0.18	0.235
Control	1	3	24	11.67	24.88	32.22	24.54	11.24	31.18	40.25	6.3	3.36	13	1.04	0.226	0.295	0.237	0.252667		14.4	27.27	34.71	27.12	14.1	37.53	47.6	6.35	4.45	8	1.35	0.245	0.34	0.24	0.275
Control	1	3	25	9.69	23.88	29.35	21.68	11.05	30.57	37.49	5.98	3.1	10	1.04	0.203	0.282	0.225	0.236667		14.13	26.97	35.35	27.53	12.33	34.1	47.85	7.8	4.61	8	1.28	0.23	0.36	0.255	0.281667
Control	1	3	26	11.32	25.24	32.66	24.92	10.31	33.65	45.71	6.45	3.67	12	0.92	0.222	0.235	0.206	0.221		14.71	27.7	34.91	25.7	13.14	41.83	51.85	6.98	4.37	9	1.22	0.231	0.244	0.23	0.235
Control	1	3	27	11.48	25.51	32.43	25.32	10.47	34.75	44.92	6.45	3.66	13	1.12	0.208	0.229	0.213	0.216667		13.45	26.6	34.52	25.1	12.1	35.2	46.75	7.34	4.2	9	1.21	0.245	0.366	0.244	0.285
Control	1	3	28	12.24	25.53	32.93	25.55	11.2	34.27	43.06	5.75	3.64	12	1.18	0.234	0.275	0.233	0.247333		14.23	27.5	34.1	26.16	13.55	38.5	46.16	6.1	3.98	8	1.15	0.33	0.28	0.225	0.278333
Control	1	3	29	11.75	25.21	31.75	22.88	12.02	33.15	44.67	6.26	3.4	12	1.12	0.238	0.292	0.214	0.248		13.5	26.82	34.3	26.51	12.3	40.82	46.65	5.98	3.98	9	1.28	0.24	0.319	0.25	0.269667
Control	1	3	30	10.05	23.69	30.79	20.24	12.45	28.65	39.06	6.72	2.5	11	1.1	0.256	0.254	0.211	0.240333		14.6	27.16	36.26	25.2	10.1	38.99	57.75	6.75	5.3	8	1.3	0.249	0.282	0.238	0.256333
PH 2%	2	1	31	12.55	26.12	33.81	23.87	12.71	37.54	42.53	6.85	3.33	12	0.84	0.198	0.242	0.223	0.221		13.41	26.11	32.9	25.54	11.7	31.11	43.7	8.11	5	9	1.24	0.28	0.285	0.24	0.268333
PH 2%	2	1	32	12.67	26.06	33.59	23.64	12.2	31.72	42.58	7.55	3.29	11	1.08	0.232	0.282	0.222	0.245333		15.15	26.45	38.55	26.86	12.55	40.41	50.96	5.75	4.65	9	1.29	0.29	0.34	0.248	0.292667
PH 2%	2	1	33	12.12	25.98	32.44	23.16	11.56	34.53	41.97	7.05	3.23	11	1.06	0.245	0.319	0.242	0.268667		13.9	27.61	33.9	25.98	13.37	38.48	52.17	5.95	5.02	9	1.12	0.225	0.264	0.23	0.239667
PH 2%	2	1	34	12.75	26.22	33.6	23.34	12.38	37.56	46.1	7.05	3.7	13	1	0.22	0.292	0.229	0.247		14.94	27.8	35.51	27.7	12.15	37.1	48.18	6.5	4.33	8	1.18	0.226	0.28	0.22	0.242
PH 2%	2	1	35	11.95	25.52	32.66	23.36	11.59	34.55	41.45	6.66	3.14	13	0.89	0.203	0.246	0.188	0.212333		15.33	28.12	35.72	28.48	12.3	37.1	50.5	7.8	5.15	9	1.38	0.21	0.261	0.23	0.233667
PH 2%	2	1	36	11.94	25.5	32.62	24.28	11.17	36.67	42.43	7.05	3.03	10	1.03	0.232	0.275	0.196	0.234333		12.05	26.7	33.75	24.87	12.42	37.26	52.23	6.5	3.5	10	1.24	0.21	0.22	0.264	0.231333
PH 2%	2	1	37	12.22	25.95	32.86	23.09	12.32	37.32	45.68	6.68	2.97	11	1.14	0.248	0.274	0.256	0.259333		14.8	27.61	35.67	28.06	12.15	38.1	48.1	6.6	4.8	10	1.14	0.214	0.271	0.214	0.233
PH 2%	2	1	38	11.25	25.84	31.17	23.8	11.73	34.15	45.85	6.3	3	12	1.06	0.205	0.281	0.212	0.232667		12.99	26.44	33.56	23.55	12.1	35.05	52.66	6.7	3.71	9	1.09	0.195	0.23	0.21	0.211667
PH 2%	2	1	39	12.42	25.25	32.07	23.58	12.13	31.92	39.01	6.92	3.39	12	1.15	0.224	0.245	0.238	0.235667		13.7	26.98	34.12	25.4	12.88	36.35	46.45	6.6	4.05	10	1.25	0.196	0.27	0.209	0.225
PH 2%	2	1	40	9.86	23.58	30.19	24.06	9.16	32.26	44.57	5.6	3.05	11	1.13	0.221	0.267	0.23	0.239333		13.7	27.36	33.63	24.97	12.8	35.8	48.65	7.3	3.94	10	1.22	0.2	0.262	0.192	0.218
PH 2%	2	2	41	12.79	26.26	32.55	23.66	12.62	33.36	42.95	7.06	4.02	14	1.118	0.233	0.295	0.244	0.257333		14.64	28.15	33.98	27.4	11.95	39.7	50.35	6.98	4.9	10	1.3	0.22	0.26	0.228	0.236
PH 2%	2	2	42	11.25	25.52	31.15	23.63	12.3	31.3	39.15	8.42	2.99	14	1.22	0.237	0.316	0.238	0.263667		14.74	27.9	35.33	25.85	12.7	36.66	55.65	6.58	4.45	10	1.21	0.22	0.339	0.244	0.267667
PH 2%	2	2	43	8.23	23.67	28.91	20.43	10.5	26.69	38.25	6.25	2	11	1.12	0.275	0.313	0.2	0.262667		14.52	27.65	34.18	27.12	13.3	40.8	53.3	5.95	4.5	10	1.22	0.225	0.262	0.23	0.239
PH 2%	2	2	44	10.08	24.2	30.85	23.1	10.13	24.92	41.1	5.35	2.97	11	1.18	0.266	0.358	0.244	0.289333		13.22	26.98	34.05	26.73	12.1	35.72	55.47	6.4	4.1	10	1.26	0.255	0.351	0.244	0.283333
PH 2%	2	2	45	10.2	25.45	31.61	24.1	10.4	27.8	41.25	5.16	3.4	12	0.92	0.236	0.374	0.203	0.271		13.3	26.6	34.1	24.32	13.03	34.2	46.26	6.9	3.9	10	1.14	0.232	0.342	0.233	0.269
PH 2%	2	2	46	10.78	25.26	30.86	21.2	12.7	31.51	39.44	7.55	2.64	13	0.87	0.202	0.286	0.22	0.236		13.03	27.48	31.67	24.7	13.08	34.05	45.7	6.85	3.94	9	1.08	0.239	0.333	0.223	0.265
PH 2%	2	2	47																	15	27.96	35.58	26.28	13.4	38.1	49.98	6.51	4.6	10	0.24	0.268	0.298	0.245	0.270333
PH 2%	2	2	48																	13.55	26.73	35.62	26.58	12.17	35.33	56.45	6.15	4.65	10	1.13	0.225	0.31	0.21	0.248333
PH 2%	2	2	49																	13.56	26.88	34.56	25.7	12.2	34.97	50.25	7.26	4.2	10	1.12	0.214	0.278	0.22	0.237333
PH 2%	2	2	50																	13.6	27.15	33.55	27.4	11.4	36.7	49.1	5.99	4.48	10	1.12	0.21	0.31	0.198	0.239333
PH 2%	2	3	51	11.05	24.93	32.38	23.02	11.32	33.3	40.33	6.5	2.88	12	1.11	0.264	0.313	0.202	0.259667		13.6	27.06	33.35	24.15	12.37	38.6	51.52	5.78	4	9	1.22	0.22	0.348	0.238	0.268667
PH 2%	2	3	52	9.55	23.8	30.23	23.1	11.6	34.47	44.22	5.04	2.74	13	1.14	0.234	0.283	0.251	0.256		15.7	28.29	36.62	26.51	13.16	37.01	47.2	7.1	4.5	10	1.24	0.241	0.319	0.201	0.253667
PH 2%	2	3	53	9.88	24.6	29.75	24	11.55	30.85	39.5	6.28	2.9	14	0.72	0.214	0.243	0.212	0.223		17.89	28.9	39.47	27.73	12.2	47.5	62.1	5.75	5	9	1.48	0.226	0.26	0.215	0.233667
PH 2%	2	3	54																	13.9	27.49	33.97	26.06	12.95	36.96	52.05	6.35	4.2	10	1.25	0.226	0.23	0.224	0.226667
PH 2%	2	3	55																	15.78	28.45	36.46	27.1	12.56	38.95	51.62	6.05	4	10	1.21	0.2	0.36	0.224	0.261333
PH 2%	2	3	56																	13.8	27.15	34.63	26.75	12.6	43.4	49.35	5.95	4.4	10	1.32	0.215	0.307	0.228	0.25
PH 2%	2	3	57																	13.69	27.05	34.32	25.1	12.98	38.45	46.4	6.15	5.29	10	1.23	0.238	0.282	0.21	0.243333
PH 2%	2	3	58																	14.15	27.51	37.52	26.05	12.43	37.61	46.35	4.88	4.6	9	1.14	0.249	0.32	0.21	0.259667
PH 2%	2	3	59																	15.43	28.22	35.85	26.1	12.8	39.85	48.58	6.7	4	9	1.18	0.205	0.365	0.198	0.256
PH 2%	2	3	60																	13.55	26.91	34.93	29.53	13.13	38.7	53.95	5.9	6.1	14	0.98	0.195	0.188	0.155	0.179333
PH 4%	3	1	61	9.16	24.02	27.27	20.08	11.15	29.55	36.8	6.02	2.19	12	0.9	0.232	0.258	0.203	0.231		14.88	28.38	34.56	25.88	13.97	35.18	48.08	7.7	4.2	10	1.22	0.208	0.295	0.211	0.238
PH 4%	3	1	62	11.32	25.47	32.59	24.34	12.65	32.25	39.85	6.85	3.25	14	0.94	0.205	0.205	0.187	0.199		14.85	28.22	34.42	26.22	13.8	37.53	46.5	7.25	4	10	1.18	0.215	0.266	0.198	0.226333
PH 4%	3	1	63	11.5	25.98	32.02	26.25	11.55	43.05	56.54	5.65	3.25	11	1.04	0.186	0.183	0.2	0.189667		12.75	26.62	34.65	25.47	12.25	34.67	43.5	6.7	3.5	10	1.18	0.195	0.23	0.192	0.205667
PH 4%	3	1	64	9.85	23.96	31.15	20.63	11.96	35.8	44.55	6.56	2.06	13	1.14	0.285	0.325	0.277	0.295667		12.3	25.89	32.36	24.51	11.8	32.5	44.45	6.8	3.4	9	1.25	0.22	0.38	0.23	0.276667
PH 4%	3	1	65	11.5	26.51	31.51	23.96	12.5	33.73	41.1	6.03	2.88	12	0.98	0.317	0.342	0.304	0.321		12.7	26.45	33.59	23.15	11.8	31.87	40.99	6.2	3.35	12	1.02	0.198	0.31	0.203	0.237
PH 4%	3	1	66	13.08	27.08	33.13	22.02	12.45	29.98	40.9	6.77	3.05	12	0.89	0.283	0.334	0.253	0.29		14.8	28.3	34.15	27.99	12.35	36.6	44.2	6.5	4.85	10	1.16	0.229	0.322	0.228	0.259667
PH 4%	3	1	67	13.1	27	33.06	25.02	12.25	35.2	46.48	6.98	3.26	12	0.97	0.278	0.349	0.278	0.301667		13	26.96	32.55	23.75	12.55	35.85	45.35	8.15	3.4	11	1.15	0.205	0.258	0.199	0.220667
PH 4%	3	1	68	10.9	25.16	31.1	22.07	11.86	30.55	44.18	5.78	3	13	1.03	0.293	0.318	0.237	0.282667		14.5	28.1	33.7	25.63	13.53	35.17	49.5	6.45	4.7	11	1.08	0.21	0.317	0.215	0.247333
PH 4%	3	1	69	11.1	25.39	30.98	22.51	12.2	34.1	40.8	7.13	2.85	14	0.92	0.249	0.281	0.24	0.256667		13.25	27.37	33.31	24.74	11.9	37.8	45.65	7.7	3.63	10	1.15	0.175	0.277	0.214	0.222
PH 4%	3	1	70	11.5	25.25	32.32	24.15	11.8	34.9	40.8	5.75	2.9	11	1.03	0.335	0.346	0.277	0.319333		11.7	25.65	32.53	23.32	11.7	35.7	47.1	7.1	3.3	9	0.92	0.215	0.327	0.211	0.251
PH 4%	3	2	71	12.75	26.4	33.5	23.7	12.22	35.85	42.4	7.38	3	12	1.07	0.27	0.268	0.255	0.264333		14.77	28.63	33.88	27.5	12.25	40.22	50.17	6.4	4.8	11	1.2	0.229	0.305	0.205	0.246333
PH 4%	3	2	72	10.87	24.8	31.8	20.63	11.52	32.71	44.72	5.95	2.88	13	1.06	0.258	0.36	0.237	0.285		14.2	27.77	34.04	27.85	12.75	38.1	45.95	6.77	5.3	9	1.26	0.219	0.246	0.228	0.231
PH 4%	3	2	73	12.4	26.4	33.27	24.2	12.65	34.95	47.06	5.36	3.5	13	1.03	0.297	0.274	0.252	0.274333		13.25	26.72	34.05	23.86	10.1	55.52	46.2	5.8	3.78	8	1.19	0.226	0.262	0.21	0.232667
PH 4%	3	2	74	10.9	25.03	31.75	23.39	11.85	32.02	38.25	6.42	3.98	10	1.09	0.361	0.31	0.286	0.319		12	26.13	32.9	24.85	11.6	40.65	54.95	4.8	4.05	12	1.09	0.255	0.38	0.24	0.291667
PH 4%	3	2	75	12.04	26.51	32.64	24.46	11.57	29.96	40.6	5.75	3.2	11	1.13	0.305	0.307	0.267	0.293		16.11	28.65	34.73	29.6	11.98	42.99	52.25	5.95	4	10	1.18	0.24	0.299	0.232	0.257
PH 4%	3	2	76	10.36	24.46	31.02	22.84	11.88	29.6	39.05	5.85	2.71	13	1.14	0.289	0.335	0.288	0.304		14.2	27.71	35.25	26.25	12.7	34.5	46.8	7.1	4	9	1.25	0.236	0.232	0.23	0.232667
PH 4%	3	2	77	12.05	25.84	33.1	22.34	12.2	31.6	38.97	6.67	3.3	13	1.22	0.31	0.327	0.275	0.304		15.92	27.2	34.76	26.93	12.7	37.32	48.4	6.85	4.15	10	1.26	0.23	0.309	0.229	0.256
PH 4%	3	2	78	12.6	26.1	32.54	24.96	11.48	36.05	53.72	6.48	3.5	13	1.08	0.271	0.36	0.265	0.298667		12.73	26.02	33.99	24.27	9.3	39.1	50.75	5.75	4.25	10	1.1	0.245	0.265	0.216	0.242
PH 4%	3	2	79	11.6	25.58	32.98	24.08	12.5	27.28	28.6	6.3	3.1	13	1.07	0.27	0.262	0.245	0.259		13.9	27.65	33.99	26.2	13.86	32.99	52.38	7.02	4.6	10	1.02	0.233	0.31	0.23	0.257667
PH 4%	3	2	80	12.5	26.43	32.78	24.06	12.75	34.41	39.73	7.45	3.02	12	0.94	0.3	0.343	0.24	0.294333		12.22	26.47	33.26	24.99	11.9	43.19	52.21	6.9	4.11	12	1.09	0.23	0.321	0.231	0.260667
PH 4%	3	3	81	12.3	22.98	29.88	24.3	12.5	30.03	42.53	8.12	3.15	13	0.87	0.252	0.292	0.229	0.257667		15.16	28.24	35.01	26.04	13.5	37.55	52.15	6.88	4.8	10	1.4	0.236	0.276	0.234	0.248667
PH 4%	3	3	82	12.1	25.98	32.97	22.77	11.3	39.6	46.83	6.35	3.1	14	1.13	0.282	0.298	0.216	0.265333		15.7	28.18	36.27	27.42	12.5	38.74	48.65	6.5	4.4	10	1.29	0.254	0.378	0.256	0.296
PH 4%	3	3	83	10.7	24.88	31.01	24.69	13.6	25.7	37.06	7.45	2.62	13	1.24	0.26	0.263	0.253	0.258667		12.1	26.03	32.06	26.15	11.98	36.8	46.7	6.78	4.1	10	1.02	0.228	0.374	0.237	0.279667
PH 4%	3	3	84	10.99	24.39	31.02	19.9	11.91	39.75	46.41	5.72	3.02	13	1.1	0.259	0.29	0.228	0.259		16.4	29.09	36.55	28.68	13.5	38.59	48.58	6.7	5.2	11	1.17	0.238	0.282	0.228	0.249333
PH 4%	3	3	85	11.79	26.06	32.33	24.36	10.92	40.41	48.8	5.45	3.5	11	1.04	0.381	0.298	0.302	0.327		13.3	26.86	33.82	23.89	12.47	36.18	52.6	6.5	4	10	1.11	0.28	0.265	0.215	0.253333
PH 4%	3	3	86	12.28	26.93	31.9	22.12	11.55	32.43	48.2	4.6	3.45	12	1.16	0.288	0.317	0.26	0.288333		14.5	28.02	35.14	26.8	12.25	39.92	50.85	6.57	4.6	10	1.1	0.198	0.289	0.207	0.231333
PH 4%	3	3	87	11.11	25.34	31.88	22.42	12.01	39.3	51.55	5.56	3.3	12	1.46	0.27	0.308	0.289	0.289		14.8	27.77	34.24	24.45	13.5	37.1	49.98	7.2	4.01	11	1.33	0.244	0.327	0.245	0.272
PH 4%	3	3	88	10.14	25.36	30.56	22.04	12.1	38.6	40.02	5.45	2.6	11	1.17	0.257	0.336	0.236	0.276333		15.6	28.18	35.35	26.41	13.6	37.25	50	7.45	4.8	10	1.24	0.214	0.297	0.226	0.245667
PH 4%	3	3	89	12.73	26.9	32.64	23.62	12.05	30.5	41.47	5.15	3.3	13	1.25	0.249	0.293	0.233	0.258333		13.8	27.43	33.6	26.23	12.46	35.3	49.45	6.26	4.3	10	1.01	0.222	0.307	0.225	0.251333
PH 4%	3	3	90	10.35	26.08	29.27	21.51	12.15	34.15	42.75	5.85	2.75	11	0.98	0.202	0.169	0.248	0.206333		12.05	26.1	31.9	23.55	12.1	31.37	40.4	6.58	3.3	11	1.14	0.226	0.288	0.227	0.247
PH 6%	4	1	91	11.5	25.83	31.01	22.97	11.4	35.88	44.88	5.56	2.76	13	0.99	0.217	0.313	0.205	0.245		14.1	26.84	35.87	25.91	12.86	36.95	46.73	7.1	3.8	11	1.33	0.245	0.305	0.243	0.264333
PH 6%	4	1	92	10.92	25.07	30.99	21.77	11.29	30.83	37.99	5.84	2.43	13	1.05	0.288	0.235	0.251	0.258		12.82	26.62	33.4	24.2	10.2	34.93	44.12	5.85	3.35	10	1.36	0.241	0.28	0.244	0.255
PH 6%	4	1	93	9.88	24.47	29.97	20.74	11.55	32.04	37.45	4.85	2.57	10	1.28	0.282	0.286	0.231	0.266333		13.6	27.18	34.62	24.95	13.25	39.5	52.38	6.4	3.65	11	1.16	0.227	0.298	0.216	0.247
PH 6%	4	1	94	11.02	25.01	31.86	21.36	11.8	31.65	41.4	6.5	2.5	13	1.18	0.239	0.305	0.246	0.263333		15.1	27.97	35.4	28.48	13.3	32.16	47.35	7.74	4.6	11	1.38	0.217	0.272	0.215	0.234667
PH 6%	4	1	95	12.1	26.6	31.26	23.97	11.3	37.95	45.8	6.3	2.8	11	0.92	0.256	0.286	0.22	0.254		13.85	27.3	34.21	25	12.77	36.3	55.1	6.58	3.98	11	1.18	0.246	0.295	0.246	0.262333
PH 6%	4	1	96	10.11	24.59	30.34	22.7	9.95	33.98	41.87	4.55	2.8	14	1.08	0.252	0.195	0.245	0.230667		13.35	26.85	34.98	26.55	11.8	41.84	55.8	4.96	4.2	11	1.2	0.228	0.312	0.226	0.255333
PH 6%	4	1	97	11.7	25.73	32.11	23.5	6.8	23.18	44.66	5.22	2.76	12	1.02	0.234	0.26	0.225	0.239667		13.2	26.97	33.1	24.52	12.22	34.14	46.13	6.48	3.86	11	1.22	0.235	0.295	0.237	0.255667
PH 6%	4	1	98	12.65	25.5	35.01	22.6	8.9	36.7	48.4	3.55	3.65	14	1.05	0.266	0.331	0.226	0.274333		14.1	26.27	37.2	25.15	12.55	37.4	57.1	5.85	4.15	10	1.15	0.192	0.298	0.203	0.231
PH 6%	4	1	99																	13.1	26.41	34.16	25.98	11.9	40.94	49.31	7.03	4.1	11	1.14	0.265	0.31	0.245	0.273333
PH 6%	4	1	100																	13.5	26.4	35.77	25.88	11.85	40.95	56.38	5.1	4.3	11	1.19	0.234	0.276	0.23	0.246667
PH 6%	4	2	101	12.38	26.02	32.44	23.28	9.97	33.7	41.7	5.7	2.72	11	1.19	0.21	0.266	0.224	0.233333		15.23	28.3	34.85	25.2	13.1	38.56	51	6.85	4.35	11	1.18	0.196	0.365	0.24	0.267
PH 6%	4	2	102	12.5	24.51	31.72	23.13	10.08	31.1	40.44	5.98	2.6	14	0.94	0.218	0.312	0.208	0.246		13.28	26.93	33.83	26.18	13.2	33.99	55.85	5.98	4.7	13	1.24	0.245	0.292	0.242	0.259667
PH 6%	4	2	103	10.65	25.18	30.4	22.24	12.13	32.4	38.45	6.3	2.6	13	1.1	0.219	0.262	0.207	0.229333		12.8	26.18	33.55	25.2	10.95	38.16	45.75	5.95	3.65	13	1.08	0.222	0.229	0.23	0.227
PH 6%	4	2	104	11.55	25.57	31.29	23.06	12.5	32.95	42.69	7.08	2.7	12	1.14	0.285	0.224	0.239	0.249333		13.6	27.21	34.15	25.17	12.65	34.5	46.55	6.1	3.99	12	1.11	0.243	0.342	0.244	0.276333
PH 6%	4	2	105	10.11	23.58	31.14	22.7	10.05	33.95	41.8	5.45	2.8	14	0.96	0.213	0.202	0.197	0.204		13.2	26.72	34.7	26.8	12.06	38.1	47.9	5.82	4.5	12	1.21	0.23	0.358	0.245	0.277667
PH 6%	4	2	106																	12.7	26.26	33.73	25.88	11.25	34.7	49.88	6.3	4.1	11	1.17	0.235	0.309	0.238	0.260667
PH 6%	4	2	107																	15.4	28.16	35.9	24.8	12.73	38.24	47.14	6.45	4.4	12	1.24	0.229	0.318	0.25	0.265667
PH 6%	4	2	108																	14.7	27.42	35.02	25.87	12.7	39.85	51.05	7.1	4.11	11	1.13	0.213	0.317	0.223	0.251
PH 6%	4	2	109																	13.1	26.3	34.85	25.71	11.88	38.6	55.1	6.2	4.2	12	1.22	0.22	0.288	0.223	0.243667
PH 6%	4	2	110																	15.35	28.1	35.9	26.95	12.41	35.55	47.85	6.7	4.6	10	1.19	0.234	0.322	0.238	0.264667
PH 6%	4	3	111	12.05	25.93	32.39	23.1	11.25	36.55	48.2	6.4	2.4	12	1.01	0.203	0.221	0.199	0.207667		13.85	27.71	34.34	25.45	13.1	32.95	47.94	6.98	4	12	1.21	0.226	0.312	0.224	0.254
PH 6%	4	3	112	12.44	25.96	32.8	22.58	12.3	32.6	44.27	6.7	3.12	13	1.18	0.214	0.262	0.179	0.218333		13.1	27.06	32.78	25.34	11.1	34.2	47.57	5.85	3.85	13	1.12	0.236	0.288	0.228	0.250667
PH 6%	4	3	113	13.32	26.23	35.64	24.75	12.05	36.2	48.9	6.05	3.55	13	0.96	0.221	0.278	0.21	0.236333		15.1	28.1	34.67	26.72	13.3	42.6	52.71	6.1	4.7	11	1.1	0.213	0.313	0.221	0.249
PH 6%	4	3	114	11.85	25.72	32.15	22.28	9.18	31.27	43.74	5.75	2.79	12	1.39	0.205	0.19	0.189	0.194667		13	26.63	33.36	24.82	11.85	40.5	51.2	5.6	3.8	12	1.09	0.235	0.236	0.23	0.233667
PH 6%	4	3	115	11.7	26.15	32.44	23.12	9.55	35.1	45.77	5.2	2.9	12	1.18	0.206	0.322	0.182	0.236667		14.1	27.35	34.9	26.2	13.4	34.66	55.3	6.45	4.5	11	1.18	0.217	0.317	0.226	0.253333
PH 6%	4	3	116	10.87	25.23	30.93	22.55	8.45	29.15	44.5	5.1	2.8	13	1.05	0.232	0.249	0.166	0.215667		13.6	27.3	33.65	23.86	13.8	39.47	46.15	6.9	4.49	12	1.16	0.212	0.318	0.215	0.248333
PH 6%	4	3	117	12.6	25.35	34.12	24.9	9.17	32.95	43.5	6	3.12	13	0.86	0.244	0.259	0.221	0.241333		14.48	27.67	35.45	24.18	10.1	38.15	54.2	6.4	4.5	12	1.07	0.228	0.287	0.216	0.243667
PH 6%	4	3	118	11.88	25.7	32.94	25.1	8.55	38.37	52.2	5.02	3.05	12	0.86	0.219	0.214	0.21	0.214333		14.85	27.96	34.34	27.89	13.23	43.49	50.04	6.27	4.7	12	1.2	0.2	0.29	0.203	0.231
PH 6%	4	3	119	9.75	23.57	28.45	19.2	11.5	36.36	43.96	5.1	2.74	11	1.02	0.196	0.318	0.214	0.242667		14.5	27.45	35.12	26.12	13.4	38.43	50.72	5.87	4.35	11	1.22	0.2	0.277	0.222	0.233
PH 6%	4	3	120																	15.45	28.27	35.7	27.34	12.55	46.02	55.2	5.98	4.8	12	1.17	0.208	0.34	0.228	0.258667
Haugh Unit		Hu:	206.298		h:6,45 G:12,87
		100*log(h+7,57-1,7*G^0,37)			h: White height
		98.4295			G: Egg Weight
		^	Şift 3 ile yapılıyor

## Sheet: Egg Traits 2
Egg Traits				01,12.2021												Shell Thickness				30,12.2021			Sarı çapı				h						Shell Thickness				G
Group	Group	Replicate	Number	Egg Weight	Width	Length	Yellow Diameter	Yellow height	Egg white with	Egg White Length	Egg White Height	Yellow Weight	Yellow Color	shell weight	Blunt	Pointed	Medium	Shell Thickness		Egg Weight	Width	Length	Yellow Diameter	Yellow height	Egg white with	Egg White Length	Egg White Height	Egg white, width and length	Yellow Weight	Yellow Color	shell weight	Blunt	Pointed	Medium	Shell Thickness		Egg Weight	shape index	White index	Yellow index	Haugh Unit	Yellow color	Yellow weight	Shell weight	Shell Thickness
Control	1	1	1	12.04	26.39	32.36	22.51	12.08	33.08	42.42	6.45	3.19	11	1.21	0.192	0.22	0.211	0.207667		12.87	26.21	33.25	26.65	12.78	35.7	50.4	6.45	43.05	3.93	8	1.27	0.215	0.289	0.21	0.238		12.87	78.8271	14.9826	47.955	98.4295	8	3.93	1.27	0.238
Control	1	1	2	12.66	25.96	33.17	22.8	12.1	34.77	41.5	8.18	3.85	10	1.23	0.242	0.197	0.228	0.222333		13.14	26.46	34.43	25.3	11.7	39.1	46.8	5.48	42.95	4.75	8	0.96	0.228	0.304	0.217	0.249667		13.14	76.8516	12.759	46.2451	93.657	8	4.75	0.96	0.249667
Control	1	1	3	11.82	26.18	30.88	22.61	13.32	33.88	40.35	6.15	3.16	9	1.16	0.386	0.395	0.386	0.389		14.93	27.73	34.75	26.7	12.75	44.76	57.91	6.45	51.335	4.58	8	1.24	0.22	0.315	0.211	0.248667		14.93	79.7986	12.5645	47.7528	97.3025	8	4.58	1.24	0.248667
Control	1	1	4	10.13	24.32	30.57	21.2	12.4	36.65	48.2	5.4	3.1	11	0.96	0.337	0.285	0.271	0.297667		13.87	27.55	33.72	25.55	12.28	38.24	45.3	7.35	41.77	4.14	9	1.48	0.245	0.305	0.26	0.27		13.87	81.7023	17.5964	48.0626	101.795	9	4.14	1.48	0.27
Control	1	1	5	10.91	24.93	31.75	21.86	12.07	32.64	47.1	7.15	2.9	11	1.03	0.331	0.368	0.257	0.318667		13.54	26.53	34.95	24.5	12.3	31.92	42.75	6.8	37.335	3.99	8	1.23	0.24	0.37	0.22	0.276667		13.54	75.9084	18.2135	50.2041	99.6158	8	3.99	1.23	0.276667
Control	1	1	6	9.34	23.66	30.11	21.69	11.23	34.86	43.61	5.35	2.9	9	0.99	0.268	0.31	0.242	0.273333		12.8	26.17	34.7	24.35	12.55	34.8	49.4	7.15	42.1	3.5	8	1.18	0.22	0.28	0.23	0.243333		12.8	75.4179	16.9834	51.54	101.509	8	3.5	1.18	0.243333
Control	1	1	7	12.55	26.55	33.45	23.5	12.76	35.62	43.81	6.77	3.81	10	1.11	0.265	0.244	0.246	0.251667		12.72	26.94	32.9	24.58	11.74	34.79	41.45	7.1	38.12	3.71	8	1.23	0.214	0.265	0.215	0.231333		12.72	81.8845	18.6254	47.7624	101.342	8	3.71	1.23	0.231333
Control	1	1	8	11.5	25.58	31.46	24.46	12.43	31.39	39.77	6.4	3.39	10	1.14	0.249	0.268	0.272	0.263		14.72	27.1	36.9	26.81	12.73	40.95	41.91	7.45	41.43	4.7	8	1.35	0.23	0.281	0.229	0.246667		14.72	73.4417	17.9821	47.4823	101.795	8	4.7	1.35	0.246667
Control	1	1	9	11.3	24.67	33.97	22.78	10.92	33.4	48.65	6.08	3.12	11	0.96	0.265	0.361	0.218	0.281333		13.21	26.88	34.25	25.73	13.1	39.17	50.37	5.68	44.77	4.45	8	1.43	0.236	0.33	0.25	0.272		13.21	78.4818	12.6871	50.9133	94.608	8	4.45	1.43	0.272
Control	1	1	10	11.04	25.72	31.91	20.4	11.8	32.06	40.86	6.54	2.96	9	0.83	0.324	0.205	0.272	0.267		10.89	25.43	31.04	24.52	12.5	32.31	39.58	6.75	35.945	3.55	8	1.17	0.226	0.265	0.225	0.238667		10.89	81.9265	18.7787	50.9788	100.89	8	3.55	1.17	0.238667
Control	1	2	11	11.52	25.31	33.12	21.9	12.1	33.82	48.8	6.8	3.1	10	0.99	0.293	0.224	0.292	0.269667		13.27	27.14	33.78	25.98	11.99	38.8	47.65	6.35	43.225	4.06	8	1.16	0.227	0.288	0.22	0.245		13.27	80.3434	14.6906	46.1509	97.7496	8	4.06	1.16	0.245
Control	1	2	12	12.2	26.32	32.35	22.88	12.96	35.2	44.47	6.44	3.65	10	0.98	0.224	0.329	0.208	0.253667		13.18	26.42	33.92	24.86	11.4	40.4	47.87	6.42	44.135	4.5	8	1.35	0.225	0.323	0.221	0.256333		13.18	77.8892	14.5463	45.8568	98.1191	8	4.5	1.35	0.256333
Control	1	2	13	10.43	25.08	30.21	21.26	11.64	31.9	39.16	6.2	3.11	11	1.11	0.313	0.3	0.269	0.294		13.15	26.53	34.14	25.82	11.94	40.7	57.8	5.95	49.25	4.1	8	1.13	0.21	0.245	0.198	0.217667		13.15	77.7094	12.0812	46.2432	95.9512	8	4.1	1.13	0.217667
Control	1	2	14	11.15	25.52	31.1	23.86	12.1	32.99	45.71	6.1	3.14	11	0.95	0.326	0.257	0.235	0.272667		13.14	26.28	34.63	26.66	12.2	39.25	55.8	5.7	47.525	4.1	8	1.09	0.219	0.234	0.198	0.217		13.14	75.888	11.9937	45.7614	94.7488	8	4.1	1.09	0.217
Control	1	2	15	9	23.88	25.6	20.46	10.46	28.42	35.58	5.86	2.3	11	0.91	0.263	0.281	0.21	0.251333		12.89	26.6	33.7	25.85	12.55	39.21	48.55	5.7	43.88	4.45	8	1.14	0.195	0.29	0.194	0.226333		12.89	78.9318	12.99	48.5493	94.9016	8	4.45	1.14	0.226333
Control	1	2	16	12.1	25.55	33.51	23.11	10.33	33.79	43.27	6.55	3.33	13	0.77	0.181	0.277	0.209	0.222333		16.11	28.27	37.3	26.93	12.94	40.9	51.1	6.78	46	4.68	8	1.36	0.19	0.33	0.22	0.246667		16.11	75.7909	14.7391	48.0505	98.2083	8	4.68	1.36	0.246667
Control	1	2	17	10.55	27.73	31.27	21.27	11.27	38.32	43.8	6.1	2.84	10	1.01	0.313	0.286	0.289	0.296		13.17	26.9	33.75	25.1	12.3	34.5	45.58	6.12	40.04	4.18	9	1.21	0.228	0.318	0.224	0.256667		13.17	79.7037	15.2847	49.004	96.7426	9	4.18	1.21	0.256667
Control	1	2	18	11.22	25.13	32.77	25.47	10.95	34.28	43.38	6.37	3.55	11	1.08	0.267	0.336	0.242	0.281667		13.31	26.98	34.12	27.65	12.3	37.98	50.4	7.95	44.19	4.19	9	1.14	0.198	0.305	0.205	0.236		13.31	79.0739	17.9905	44.4846	104.494	9	4.19	1.14	0.236
Control	1	2	19	12	26.03	32.47	22.62	11.56	38.19	45.1	6.94	3.22	12	1.14	0.317	0.325	0.234	0.292		16.4	28.25	37.45	27.1	13.1	48.45	54.56	8.2	51.505	4.58	8	1.25	0.19	0.32	0.207	0.239		16.4	75.4339	15.9208	48.3395	104.077	8	4.58	1.25	0.239
Control	1	2	20	11.6	25.63	32.27	24.83	11.28	34.72	43.07	5.88	3.36	12	1.07	0.289	0.335	0.249	0.291		10.49	24.7	34.72	23.81	10.5	38.27	50.4	4.52	44.335	3.3	8	1.09	0.245	0.284	0.229	0.252667		10.49	71.1406	10.1951	44.0991	90.4913	8	3.3	1.09	0.252667
Control	1	3	21	11.3	25.49	31.75	21.58	12.56	34.38	45.05	6.91	3.15	13	1.11	0.225	0.233	0.234	0.230667		14.9	27.77	35.34	25.94	12.87	40.14	51.95	6.21	46.045	4.51	8	1.26	0.205	0.22	0.218	0.214333		14.9	78.5795	13.4868	49.6145	96.1953	8	4.51	1.26	0.214333
Control	1	3	22	11.85	25.37	33.8	22.12	12.38	33.69	44.55	5.85	3.12	12	1.01	0.224	0.208	0.211	0.214333		14.8	27.58	36.25	26.56	13.7	42.9	58.1	7.27	50.5	4.4	8	1.24	0.186	0.21	0.205	0.200333		14.8	76.0828	14.396	51.5813	100.999	8	4.4	1.24	0.200333
Control	1	3	23	11.8	24.93	32.24	22.14	10.67	30.98	42.35	6.62	3.4	11	1.03	0.231	0.249	0.216	0.232		12.3	26.44	32.6	26.27	10.9	37.83	52.55	5.9	45.19	3.98	9	0.96	0.215	0.31	0.18	0.235		12.3	81.1043	13.056	41.4922	96.2254	9	3.98	0.96	0.235
Control	1	3	24	11.67	24.88	32.22	24.54	11.24	31.18	40.25	6.3	3.36	13	1.04	0.226	0.295	0.237	0.252667		14.4	27.27	34.71	27.12	14.1	37.53	47.6	6.35	42.565	4.45	8	1.35	0.245	0.34	0.24	0.275		14.4	78.5653	14.9184	51.9912	97.1238	8	4.45	1.35	0.275
Control	1	3	25	9.69	23.88	29.35	21.68	11.05	30.57	37.49	5.98	3.1	10	1.04	0.203	0.282	0.225	0.236667		14.13	26.97	35.35	27.53	12.33	34.1	47.85	7.8	40.975	4.61	8	1.28	0.23	0.36	0.255	0.281667		14.13	76.2942	19.036	44.7875	103.507	8	4.61	1.28	0.281667
Control	1	3	26	11.32	25.24	32.66	24.92	10.31	33.65	45.71	6.45	3.67	12	0.92	0.222	0.235	0.206	0.221		14.71	27.7	34.91	25.7	13.14	41.83	51.85	6.98	46.84	4.37	9	1.22	0.231	0.244	0.23	0.235		14.71	79.3469	14.9018	51.1284	99.7958	9	4.37	1.22	0.235
Control	1	3	27	11.48	25.51	32.43	25.32	10.47	34.75	44.92	6.45	3.66	13	1.12	0.208	0.229	0.213	0.216667		13.45	26.6	34.52	25.1	12.1	35.2	46.75	7.34	40.975	4.2	9	1.21	0.245	0.366	0.244	0.285		13.45	77.0568	17.9134	48.2072	101.965	9	4.2	1.21	0.285
Control	1	3	28	12.24	25.53	32.93	25.55	11.2	34.27	43.06	5.75	3.64	12	1.18	0.234	0.275	0.233	0.247333		14.23	27.5	34.1	26.16	13.55	38.5	46.16	6.1	42.33	3.98	8	1.15	0.33	0.28	0.225	0.278333		14.23	80.6452	14.4106	51.7966	96.0432	8	3.98	1.15	0.278333
Control	1	3	29	11.75	25.21	31.75	22.88	12.02	33.15	44.67	6.26	3.4	12	1.12	0.238	0.292	0.214	0.248		13.5	26.82	34.3	26.51	12.3	40.82	46.65	5.98	43.735	3.98	9	1.28	0.24	0.319	0.25	0.269667		13.5	78.1924	13.6733	46.3976	95.8889	9	3.98	1.28	0.269667
Control	1	3	30	10.05	23.69	30.79	20.24	12.45	28.65	39.06	6.72	2.5	11	1.1	0.256	0.254	0.211	0.240333		14.6	27.16	36.26	25.2	10.1	38.99	57.75	6.75	48.37	5.3	8	1.3	0.249	0.282	0.238	0.256333		14.6	74.9035	13.9549	40.0794	98.8374	8	5.3	1.3	0.256333
PH 2%	2	1	31	12.55	26.12	33.81	23.87	12.71	37.54	42.53	6.85	3.33	12	0.84	0.198	0.242	0.223	0.221		13.41	26.11	32.9	25.54	11.7	31.11	43.7	8.11	37.405	5	9	1.24	0.28	0.285	0.24	0.268333		13.41	79.3617	21.6816	45.8105	105.068	9	5	1.24	0.268333
PH 2%	2	1	32	12.67	26.06	33.59	23.64	12.2	31.72	42.58	7.55	3.29	11	1.08	0.232	0.282	0.222	0.245333		15.15	26.45	38.55	26.86	12.55	40.41	50.96	5.75	45.685	4.65	9	1.29	0.29	0.34	0.248	0.292667		15.15	68.6122	12.5862	46.7238	93.8154	9	4.65	1.29	0.292667
PH 2%	2	1	33	12.12	25.98	32.44	23.16	11.56	34.53	41.97	7.05	3.23	11	1.06	0.245	0.319	0.242	0.268667		13.9	27.61	33.9	25.98	13.37	38.48	52.17	5.95	45.325	5.02	9	1.12	0.225	0.264	0.23	0.239667		13.9	81.4454	13.1274	51.4627	95.5131	9	5.02	1.12	0.239667
PH 2%	2	1	34	12.75	26.22	33.6	23.34	12.38	37.56	46.1	7.05	3.7	13	1	0.22	0.292	0.229	0.247		14.94	27.8	35.51	27.7	12.15	37.1	48.18	6.5	42.64	4.33	8	1.18	0.226	0.28	0.22	0.242		14.94	78.2878	15.2439	43.8628	97.5277	8	4.33	1.18	0.242
PH 2%	2	1	35	11.95	25.52	32.66	23.36	11.59	34.55	41.45	6.66	3.14	13	0.89	0.203	0.246	0.188	0.212333		15.33	28.12	35.72	28.48	12.3	37.1	50.5	7.8	43.8	5.15	9	1.38	0.21	0.261	0.23	0.233667		15.33	78.7234	17.8082	43.1882	102.948	9	5.15	1.38	0.233667
PH 2%	2	1	36	11.94	25.5	32.62	24.28	11.17	36.67	42.43	7.05	3.03	10	1.03	0.232	0.275	0.196	0.234333		12.05	26.7	33.75	24.87	12.42	37.26	52.23	6.5	44.745	3.5	10	1.24	0.21	0.22	0.264	0.231333		12.05	79.1111	14.5268	49.9397	99.1232	10	3.5	1.24	0.231333
PH 2%	2	1	37	12.22	25.95	32.86	23.09	12.32	37.32	45.68	6.68	2.97	11	1.14	0.248	0.274	0.256	0.259333		14.8	27.61	35.67	28.06	12.15	38.1	48.1	6.6	43.1	4.8	10	1.14	0.214	0.271	0.214	0.233		14.8	77.404	15.3132	43.3001	98.0581	10	4.8	1.14	0.233
PH 2%	2	1	38	11.25	25.84	31.17	23.8	11.73	34.15	45.85	6.3	3	12	1.06	0.205	0.281	0.212	0.232667		12.99	26.44	33.56	23.55	12.1	35.05	52.66	6.7	43.855	3.71	9	1.09	0.195	0.23	0.21	0.211667		12.99	78.7843	15.2776	51.38	99.4748	9	3.71	1.09	0.211667
PH 2%	2	1	39	12.42	25.25	32.07	23.58	12.13	31.92	39.01	6.92	3.39	12	1.15	0.224	0.245	0.238	0.235667		13.7	26.98	34.12	25.4	12.88	36.35	46.45	6.6	41.4	4.05	10	1.25	0.196	0.27	0.209	0.225		13.7	79.0739	15.942	50.7087	98.6436	10	4.05	1.25	0.225
PH 2%	2	1	40	9.86	23.58	30.19	24.06	9.16	32.26	44.57	5.6	3.05	11	1.13	0.221	0.267	0.23	0.239333		13.7	27.36	33.63	24.97	12.8	35.8	48.65	7.3	42.225	3.94	10	1.22	0.2	0.262	0.192	0.218		13.7	81.3559	17.2883	51.2615	101.672	10	3.94	1.22	0.218
PH 2%	2	2	41	12.79	26.26	32.55	23.66	12.62	33.36	42.95	7.06	4.02	14	1.118	0.233	0.295	0.244	0.257333		14.64	28.15	33.98	27.4	11.95	39.7	50.35	6.98	45.025	4.9	10	1.3	0.22	0.26	0.228	0.236		14.64	82.8428	15.5025	43.6131	99.8312	10	4.9	1.3	0.236
PH 2%	2	2	42	11.25	25.52	31.15	23.63	12.3	31.3	39.15	8.42	2.99	14	1.22	0.237	0.316	0.238	0.263667		14.74	27.9	35.33	25.85	12.7	36.66	55.65	6.58	46.155	4.45	10	1.21	0.22	0.339	0.244	0.267667		14.74	78.9697	14.2563	49.1296	97.9986	10	4.45	1.21	0.267667
PH 2%	2	2	43	8.23	23.67	28.91	20.43	10.5	26.69	38.25	6.25	2	11	1.12	0.275	0.313	0.2	0.262667		14.52	27.65	34.18	27.12	13.3	40.8	53.3	5.95	47.05	4.5	10	1.22	0.225	0.262	0.23	0.239		14.52	80.8953	12.6461	49.0413	95.1588	10	4.5	1.22	0.239
PH 2%	2	2	44	10.08	24.2	30.85	23.1	10.13	24.92	41.1	5.35	2.97	11	1.18	0.266	0.358	0.244	0.289333		13.22	26.98	34.05	26.73	12.1	35.72	55.47	6.4	45.595	4.1	10	1.26	0.255	0.351	0.244	0.283333		13.22	79.2364	14.0366	45.2675	98.0058	10	4.1	1.26	0.283333
PH 2%	2	2	45	10.2	25.45	31.61	24.1	10.4	27.8	41.25	5.16	3.4	12	0.92	0.236	0.374	0.203	0.271		13.3	26.6	34.1	24.32	13.03	34.2	46.26	6.9	40.23	3.9	10	1.14	0.232	0.342	0.233	0.269		13.3	78.0059	17.1514	53.5773	100.179	10	3.9	1.14	0.269
PH 2%	2	2	46	10.78	25.26	30.86	21.2	12.7	31.51	39.44	7.55	2.64	13	0.87	0.202	0.286	0.22	0.236		13.03	27.48	31.67	24.7	13.08	34.05	45.7	6.85	39.875	3.94	9	1.08	0.239	0.333	0.223	0.265		13.03	86.7698	17.1787	52.9555	100.108	9	3.94	1.08	0.265
PH 2%	2	2	47																	15	27.96	35.58	26.28	13.4	38.1	49.98	6.51	44.04	4.6	10	0.24	0.268	0.298	0.245	0.270333		15	78.5835	14.782	50.9893	97.5421	10	4.6	0.24	0.270333
PH 2%	2	2	48																	13.55	26.73	35.62	26.58	12.17	35.33	56.45	6.15	45.89	4.65	10	1.13	0.225	0.31	0.21	0.248333		13.55	75.0421	13.4016	45.7863	96.6644	10	4.65	1.13	0.248333
PH 2%	2	2	49																	13.56	26.88	34.56	25.7	12.2	34.97	50.25	7.26	42.61	4.2	10	1.12	0.214	0.278	0.22	0.237333		13.56	77.7778	17.0383	47.4708	101.576	10	4.2	1.12	0.237333
PH 2%	2	2	50																	13.6	27.15	33.55	27.4	11.4	36.7	49.1	5.99	42.9	4.48	10	1.12	0.21	0.31	0.198	0.239333		13.6	80.924	13.9627	41.6058	95.8785	10	4.48	1.12	0.239333
PH 2%	2	3	51	11.05	24.93	32.38	23.02	11.32	33.3	40.33	6.5	2.88	12	1.11	0.264	0.313	0.202	0.259667		13.6	27.06	33.35	24.15	12.37	38.6	51.52	5.78	45.06	4	9	1.22	0.22	0.348	0.238	0.268667		13.6	81.1394	12.8273	51.2215	94.8639	9	4	1.22	0.268667
PH 2%	2	3	52	9.55	23.8	30.23	23.1	11.6	34.47	44.22	5.04	2.74	13	1.14	0.234	0.283	0.251	0.256		15.7	28.29	36.62	26.51	13.16	37.01	47.2	7.1	42.105	4.5	10	1.24	0.241	0.319	0.201	0.253667		15.7	77.2529	16.8626	49.6416	99.8301	10	4.5	1.24	0.253667
PH 2%	2	3	53	9.88	24.6	29.75	24	11.55	30.85	39.5	6.28	2.9	14	0.72	0.214	0.243	0.212	0.223		17.89	28.9	39.47	27.73	12.2	47.5	62.1	5.75	54.8	5	9	1.48	0.226	0.26	0.215	0.233667		17.89	73.2202	10.4927	43.9957	92.3133	9	5	1.48	0.233667
PH 2%	2	3	54																	13.9	27.49	33.97	26.06	12.95	36.96	52.05	6.35	44.505	4.2	10	1.25	0.226	0.23	0.224	0.226667		13.9	80.9243	14.2681	49.693	97.3978	10	4.2	1.25	0.226667
PH 2%	2	3	55																	15.78	28.45	36.46	27.1	12.56	38.95	51.62	6.05	45.285	4	10	1.21	0.2	0.36	0.224	0.261333		15.78	78.0307	13.3598	46.3469	94.9493	10	4	1.21	0.261333
PH 2%	2	3	56																	13.8	27.15	34.63	26.75	12.6	43.4	49.35	5.95	46.375	4.4	10	1.32	0.215	0.307	0.228	0.25		13.8	78.4002	12.8302	47.1028	95.5709	10	4.4	1.32	0.25
PH 2%	2	3	57																	13.69	27.05	34.32	25.1	12.98	38.45	46.4	6.15	42.425	5.29	10	1.23	0.238	0.282	0.21	0.243333		13.69	78.817	14.4962	51.7131	96.5846	10	5.29	1.23	0.243333
PH 2%	2	3	58																	14.15	27.51	37.52	26.05	12.43	37.61	46.35	4.88	41.98	4.6	9	1.14	0.249	0.32	0.21	0.259667		14.15	73.3209	11.6246	47.7159	89.865	9	4.6	1.14	0.259667
PH 2%	2	3	59																	15.43	28.22	35.85	26.1	12.8	39.85	48.58	6.7	44.215	4	9	1.18	0.205	0.365	0.198	0.256		15.43	78.7169	15.1532	49.0421	98.1868	9	4	1.18	0.256
PH 2%	2	3	60																	13.55	26.91	34.93	29.53	13.13	38.7	53.95	5.9	46.325	6.1	14	0.98	0.195	0.188	0.155	0.179333		13.55	77.0398	12.7361	44.4633	95.4759	14	6.1	0.98	0.179333
PH 4%	3	1	61	9.16	24.02	27.27	20.08	11.15	29.55	36.8	6.02	2.19	12	0.9	0.232	0.258	0.203	0.231		14.88	28.38	34.56	25.88	13.97	35.18	48.08	7.7	41.63	4.2	10	1.22	0.208	0.295	0.211	0.238		14.88	82.1181	18.4963	53.9799	102.749	10	4.2	1.22	0.238
PH4%	3	1	62	11.32	25.47	32.59	24.34	12.65	32.25	39.85	6.85	3.25	14	0.94	0.205	0.205	0.187	0.199		14.85	28.22	34.42	26.22	13.8	37.53	46.5	7.25	42.015	4	10	1.18	0.215	0.266	0.198	0.226333		14.85	81.9872	17.2557	52.6316	100.89	10	4	1.18	0.226333
PH4%	3	1	63	11.5	25.98	32.02	26.25	11.55	43.05	56.54	5.65	3.25	11	1.04	0.186	0.183	0.2	0.189667		12.75	26.62	34.65	25.47	12.25	34.67	43.5	6.7	39.085	3.5	10	1.18	0.195	0.23	0.192	0.205667		12.75	76.8254	17.1421	48.0958	99.6073	10	3.5	1.18	0.205667
PH4%	3	1	64	9.85	23.96	31.15	20.63	11.96	35.8	44.55	6.56	2.06	13	1.14	0.285	0.325	0.277	0.295667		12.3	25.89	32.36	24.51	11.8	32.5	44.45	6.8	38.475	3.4	9	1.25	0.22	0.38	0.23	0.276667		12.3	80.0062	17.6738	48.1436	100.292	9	3.4	1.25	0.276667
PH4%	3	1	65	11.5	26.51	31.51	23.96	12.5	33.73	41.1	6.03	2.88	12	0.98	0.317	0.342	0.304	0.321		12.7	26.45	33.59	23.15	11.8	31.87	40.99	6.2	36.43	3.35	12	1.02	0.198	0.31	0.203	0.237		12.7	78.7437	17.0189	50.9719	97.3881	12	3.35	1.02	0.237
PH4%	3	1	66	13.08	27.08	33.13	22.02	12.45	29.98	40.9	6.77	3.05	12	0.89	0.283	0.334	0.253	0.29		14.8	28.3	34.15	27.99	12.35	36.6	44.2	6.5	40.4	4.85	10	1.16	0.229	0.322	0.228	0.259667		14.8	82.8697	16.0891	44.1229	97.6015	10	4.85	1.16	0.259667
PH4%	3	1	67	13.1	27	33.06	25.02	12.25	35.2	46.48	6.98	3.26	12	0.97	0.278	0.349	0.278	0.301667		13	26.96	32.55	23.75	12.55	35.85	45.35	8.15	40.6	3.4	11	1.15	0.205	0.258	0.199	0.220667		13	82.8264	20.0739	52.8421	105.417	11	3.4	1.15	0.220667
PH4%	3	1	68	10.9	25.16	31.1	22.07	11.86	30.55	44.18	5.78	3	13	1.03	0.293	0.318	0.237	0.282667		14.5	28.1	33.7	25.63	13.53	35.17	49.5	6.45	42.335	4.7	11	1.08	0.21	0.317	0.215	0.247333		14.5	83.3828	15.2356	52.7897	97.5316	11	4.7	1.08	0.247333
PH4%	3	1	69	11.1	25.39	30.98	22.51	12.2	34.1	40.8	7.13	2.85	14	0.92	0.249	0.281	0.24	0.256667		13.25	27.37	33.31	24.74	11.9	37.8	45.65	7.7	41.725	3.63	10	1.15	0.175	0.277	0.214	0.222		13.25	82.1675	18.4542	48.1002	103.533	10	3.63	1.15	0.222
PH4%	3	1	70	11.5	25.25	32.32	24.15	11.8	34.9	40.8	5.75	2.9	11	1.03	0.335	0.346	0.277	0.319333		11.7	25.65	32.53	23.32	11.7	35.7	47.1	7.1	41.4	3.3	9	0.92	0.215	0.327	0.211	0.251		11.7	78.8503	17.1498	50.1715	101.897	9	3.3	0.92	0.251
PH4%	3	2	71	12.75	26.4	33.5	23.7	12.22	35.85	42.4	7.38	3	12	1.07	0.27	0.268	0.255	0.264333		14.77	28.63	33.88	27.5	12.25	40.22	50.17	6.4	45.195	4.8	11	1.2	0.229	0.305	0.205	0.246333		14.77	84.5041	14.1609	44.5455	97.1562	11	4.8	1.2	0.246333
PH4%	3	2	72	10.87	24.8	31.8	20.63	11.52	32.71	44.72	5.95	2.88	13	1.06	0.258	0.36	0.237	0.285		14.2	27.77	34.04	27.85	12.75	38.1	45.95	6.77	42.025	5.3	9	1.26	0.219	0.246	0.228	0.231		14.2	81.5805	16.1095	45.781	99.1347	9	5.3	1.26	0.231
PH4%	3	2	73	12.4	26.4	33.27	24.2	12.65	34.95	47.06	5.36	3.5	13	1.03	0.297	0.274	0.252	0.274333		13.25	26.72	34.05	23.86	10.1	55.52	46.2	5.8	50.86	3.78	8	1.19	0.226	0.262	0.21	0.232667		13.25	78.4728	11.4039	42.3303	95.1701	8	3.78	1.19	0.232667
PH4%	3	2	74	10.9	25.03	31.75	23.39	11.85	32.02	38.25	6.42	3.98	10	1.09	0.361	0.31	0.286	0.319		12	26.13	32.9	24.85	11.6	40.65	54.95	4.8	47.8	4.05	12	1.09	0.255	0.38	0.24	0.291667		12	79.4225	10.0418	46.6801	90.8844	12	4.05	1.09	0.291667
PH4%	3	2	75	12.04	26.51	32.64	24.46	11.57	29.96	40.6	5.75	3.2	11	1.13	0.305	0.307	0.267	0.293		16.11	28.65	34.73	29.6	11.98	42.99	52.25	5.95	47.62	4	10	1.18	0.24	0.299	0.232	0.257		16.11	82.4935	12.4948	40.473	94.2793	10	4	1.18	0.257
PH4%	3	2	76	10.36	24.46	31.02	22.84	11.88	29.6	39.05	5.85	2.71	13	1.14	0.289	0.335	0.288	0.304		14.2	27.71	35.25	26.25	12.7	34.5	46.8	7.1	40.65	4	9	1.25	0.236	0.232	0.23	0.232667		14.2	78.6099	17.4662	48.381	100.573	9	4	1.25	0.232667
PH4%	3	2	77	12.05	25.84	33.1	22.34	12.2	31.6	38.97	6.67	3.3	13	1.22	0.31	0.327	0.275	0.304		15.92	27.2	34.76	26.93	12.7	37.32	48.4	6.85	42.86	4.15	10	1.26	0.23	0.309	0.229	0.256		15.92	78.2509	15.9823	47.1593	98.6174	10	4.15	1.26	0.256
PH4%	3	2	78	12.6	26.1	32.54	24.96	11.48	36.05	53.72	6.48	3.5	13	1.08	0.271	0.36	0.265	0.298667		12.73	26.02	33.99	24.27	9.3	39.1	50.75	5.75	44.925	4.25	10	1.1	0.245	0.265	0.216	0.242		12.73	76.5519	12.7991	38.3189	95.243	10	4.25	1.1	0.242
PH4%	3	2	79	11.6	25.58	32.98	24.08	12.5	27.28	28.6	6.3	3.1	13	1.07	0.27	0.262	0.245	0.259		13.9	27.65	33.99	26.2	13.86	32.99	52.38	7.02	42.685	4.6	10	1.02	0.233	0.31	0.23	0.257667		13.9	81.3475	16.4461	52.9008	100.382	10	4.6	1.02	0.257667
PH4%	3	2	80	12.5	26.43	32.78	24.06	12.75	34.41	39.73	7.45	3.02	12	0.94	0.3	0.343	0.24	0.294333		12.22	26.47	33.26	24.99	11.9	43.19	52.21	6.9	47.7	4.11	12	1.09	0.23	0.321	0.231	0.260667		12.22	79.5851	14.4654	47.619	100.766	12	4.11	1.09	0.260667
PH4%	3	3	81	12.3	22.98	29.88	24.3	12.5	30.03	42.53	8.12	3.15	13	0.87	0.252	0.292	0.229	0.257667		15.16	28.24	35.01	26.04	13.5	37.55	52.15	6.88	44.85	4.8	10	1.4	0.236	0.276	0.234	0.248667		15.16	80.6627	15.34	51.8433	99.1295	10	4.8	1.4	0.248667
PH4%	3	3	82	12.1	25.98	32.97	22.77	11.3	39.6	46.83	6.35	3.1	14	1.13	0.282	0.298	0.216	0.265333		15.7	28.18	36.27	27.42	12.5	38.74	48.65	6.5	43.695	4.4	10	1.29	0.254	0.378	0.256	0.296		15.7	77.6951	14.8758	45.5872	97.1321	10	4.4	1.29	0.296
PH4%	3	3	83	10.7	24.88	31.01	24.69	13.6	25.7	37.06	7.45	2.62	13	1.24	0.26	0.263	0.253	0.258667		12.1	26.03	32.06	26.15	11.98	36.8	46.7	6.78	41.75	4.1	10	1.02	0.228	0.374	0.237	0.279667		12.1	81.1915	16.2395	45.8126	100.318	10	4.1	1.02	0.279667
PH4%	3	3	84	10.99	24.39	31.02	19.9	11.91	39.75	46.41	5.72	3.02	13	1.1	0.259	0.29	0.228	0.259		16.4	29.09	36.55	28.68	13.5	38.59	48.58	6.7	43.585	5.2	11	1.17	0.238	0.282	0.228	0.249333		16.4	79.5896	15.3723	47.0711	97.7007	11	5.2	1.17	0.249333
PH4%	3	3	85	11.79	26.06	32.33	24.36	10.92	40.41	48.8	5.45	3.5	11	1.04	0.381	0.298	0.302	0.327		13.3	26.86	33.82	23.89	12.47	36.18	52.6	6.5	44.39	4	10	1.11	0.28	0.265	0.215	0.253333		13.3	79.4205	14.6429	52.1976	98.4137	10	4	1.11	0.253333
PH4%	3	3	86	12.28	26.93	31.9	22.12	11.55	32.43	48.2	4.6	3.45	12	1.16	0.288	0.317	0.26	0.288333		14.5	28.02	35.14	26.8	12.25	39.92	50.85	6.57	45.385	4.6	10	1.1	0.198	0.289	0.207	0.231333		14.5	79.7382	14.4761	45.709	98.0798	10	4.6	1.1	0.231333
PH4%	3	3	87	11.11	25.34	31.88	22.42	12.01	39.3	51.55	5.56	3.3	12	1.46	0.27	0.308	0.289	0.289		14.8	27.77	34.24	24.45	13.5	37.1	49.98	7.2	43.54	4.01	11	1.33	0.244	0.327	0.245	0.272		14.8	81.104	16.5365	55.2147	100.701	11	4.01	1.33	0.272
PH4%	3	3	88	10.14	25.36	30.56	22.04	12.1	38.6	40.02	5.45	2.6	11	1.17	0.257	0.336	0.236	0.276333		15.6	28.18	35.35	26.41	13.6	37.25	50	7.45	43.625	4.8	10	1.24	0.214	0.297	0.226	0.245667		15.6	79.7171	17.0774	51.4956	101.377	10	4.8	1.24	0.245667
PH4%	3	3	89	12.73	26.9	32.64	23.62	12.05	30.5	41.47	5.15	3.3	13	1.25	0.249	0.293	0.233	0.258333		13.8	27.43	33.6	26.23	12.46	35.3	49.45	6.26	42.375	4.3	10	1.01	0.222	0.307	0.225	0.251333		13.8	81.6369	14.7729	47.5029	97.0367	10	4.3	1.01	0.251333
PH4%	3	3	90	10.35	26.08	29.27	21.51	12.15	34.15	42.75	5.85	2.75	11	0.98	0.202	0.169	0.248	0.206333		12.05	26.1	31.9	23.55	12.1	31.37	40.4	6.58	35.885	3.3	11	1.14	0.226	0.288	0.227	0.247		12.05	81.8182	18.3364	51.38	99.4763	11	3.3	1.14	0.247
PH 6%	4	1	91	11.5	25.83	31.01	22.97	11.4	35.88	44.88	5.56	2.76	13	0.99	0.217	0.313	0.205	0.245		14.1	26.84	35.87	25.91	12.86	36.95	46.73	7.1	41.84	3.8	11	1.33	0.245	0.305	0.243	0.264333		14.1	74.8258	16.9694	49.6333	100.623	11	3.8	1.33	0.264333
PH6%	4	1	92	10.92	25.07	30.99	21.77	11.29	30.83	37.99	5.84	2.43	13	1.05	0.288	0.235	0.251	0.258		12.82	26.62	33.4	24.2	10.2	34.93	44.12	5.85	39.525	3.35	10	1.36	0.241	0.28	0.244	0.255		12.82	79.7006	14.8008	42.1488	95.6704	10	3.35	1.36	0.255
PH6%	4	1	93	9.88	24.47	29.97	20.74	11.55	32.04	37.45	4.85	2.57	10	1.28	0.282	0.286	0.231	0.266333		13.6	27.18	34.62	24.95	13.25	39.5	52.38	6.4	45.94	3.65	11	1.16	0.227	0.298	0.216	0.247		13.6	78.5095	13.9312	53.1062	97.7935	11	3.65	1.16	0.247
PH6%	4	1	94	11.02	25.01	31.86	21.36	11.8	31.65	41.4	6.5	2.5	13	1.18	0.239	0.305	0.246	0.263333		15.1	27.97	35.4	28.48	13.3	32.16	47.35	7.74	39.755	4.6	11	1.38	0.217	0.272	0.215	0.234667		15.1	79.0113	19.4692	46.6994	102.81	11	4.6	1.38	0.234667
PH6%	4	1	95	12.1	26.6	31.26	23.97	11.3	37.95	45.8	6.3	2.8	11	0.92	0.256	0.286	0.22	0.254		13.85	27.3	34.21	25	12.77	36.3	55.1	6.58	45.7	3.98	11	1.18	0.246	0.295	0.246	0.262333		13.85	79.8012	14.3982	51.08	98.4726	11	3.98	1.18	0.262333
PH6%	4	1	96	10.11	24.59	30.34	22.7	9.95	33.98	41.87	4.55	2.8	14	1.08	0.252	0.195	0.245	0.230667		13.35	26.85	34.98	26.55	11.8	41.84	55.8	4.96	48.82	4.2	11	1.2	0.228	0.312	0.226	0.255333		13.35	76.7581	10.1598	44.4444	90.8226	11	4.2	1.2	0.255333
PH6%	4	1	97	11.7	25.73	32.11	23.5	6.8	23.18	44.66	5.22	2.76	12	1.02	0.234	0.26	0.225	0.239667		13.2	26.97	33.1	24.52	12.22	34.14	46.13	6.48	40.135	3.86	11	1.22	0.235	0.295	0.237	0.255667		13.2	81.4804	16.1455	49.8369	98.3792	11	3.86	1.22	0.255667
PH6%	4	1	98	12.65	25.5	35.01	22.6	8.9	36.7	48.4	3.55	3.65	14	1.05	0.266	0.331	0.226	0.274333		14.1	26.27	37.2	25.15	12.55	37.4	57.1	5.85	47.25	4.15	10	1.15	0.192	0.298	0.203	0.231		14.1	70.6183	12.381	49.9006	94.9125	10	4.15	1.15	0.231
PH6%	4	1	99																	13.1	26.41	34.16	25.98	11.9	40.94	49.31	7.03	45.125	4.1	11	1.14	0.265	0.31	0.245	0.273333		13.1	77.3126	15.5789	45.8045	100.843	11	4.1	1.14	0.273333
PH6%	4	1	100																	13.5	26.4	35.77	25.88	11.85	40.95	56.38	5.1	48.665	4.3	11	1.19	0.234	0.276	0.23	0.246667		13.5	73.8049	10.4798	45.7883	91.4703	11	4.3	1.19	0.246667
PH6%	4	2	101	12.38	26.02	32.44	23.28	9.97	33.7	41.7	5.7	2.72	11	1.19	0.21	0.266	0.224	0.233333		15.23	28.3	34.85	25.2	13.1	38.56	51	6.85	44.78	4.35	11	1.18	0.196	0.365	0.24	0.267		15.23	81.2052	15.297	51.9841	98.9611	11	4.35	1.18	0.267
PH6%	4	2	102	12.5	24.51	31.72	23.13	10.08	31.1	40.44	5.98	2.6	14	0.94	0.218	0.312	0.208	0.246		13.28	26.93	33.83	26.18	13.2	33.99	55.85	5.98	44.92	4.7	13	1.24	0.245	0.292	0.242	0.259667		13.28	79.6039	13.3126	50.4202	96.0175	13	4.7	1.24	0.259667
PH6%	4	2	103	10.65	25.18	30.4	22.24	12.13	32.4	38.45	6.3	2.6	13	1.1	0.219	0.262	0.207	0.229333		12.8	26.18	33.55	25.2	10.95	38.16	45.75	5.95	41.955	3.65	13	1.08	0.222	0.229	0.23	0.227		12.8	78.0328	14.1819	43.4524	96.1595	13	3.65	1.08	0.227
PH6%	4	2	104	11.55	25.57	31.29	23.06	12.5	32.95	42.69	7.08	2.7	12	1.14	0.285	0.224	0.239	0.249333		13.6	27.21	34.15	25.17	12.65	34.5	46.55	6.1	40.525	3.99	12	1.11	0.243	0.342	0.244	0.276333		13.6	79.6779	15.0524	50.2582	96.4006	12	3.99	1.11	0.276333
PH6%	4	2	105	10.11	23.58	31.14	22.7	10.05	33.95	41.8	5.45	2.8	14	0.96	0.213	0.202	0.197	0.204		13.2	26.72	34.7	26.8	12.06	38.1	47.9	5.82	43	4.5	12	1.21	0.23	0.358	0.245	0.277667		13.2	77.0029	13.5349	45	95.297	12	4.5	1.21	0.277667
PH6%	4	2	106																	12.7	26.26	33.73	25.88	11.25	34.7	49.88	6.3	42.29	4.1	11	1.17	0.235	0.309	0.238	0.260667		12.7	77.8535	14.8971	43.4699	97.8469	11	4.1	1.17	0.260667
PH6%	4	2	107																	15.4	28.16	35.9	24.8	12.73	38.24	47.14	6.45	42.69	4.4	12	1.24	0.229	0.318	0.25	0.265667		15.4	78.4401	15.1089	51.3306	97.0554	12	4.4	1.24	0.265667
PH6%	4	2	108																	14.7	27.42	35.02	25.87	12.7	39.85	51.05	7.1	45.45	4.11	11	1.13	0.213	0.317	0.223	0.251		14.7	78.2981	15.6216	49.0916	100.321	11	4.11	1.13	0.251
PH6%	4	2	109																	13.1	26.3	34.85	25.71	11.88	38.6	55.1	6.2	46.85	4.2	12	1.22	0.22	0.288	0.223	0.243667		13.1	75.4663	13.2337	46.2077	97.1558	12	4.2	1.22	0.243667
PH6%	4	2	110																	15.35	28.1	35.9	26.95	12.41	35.55	47.85	6.7	41.7	4.6	10	1.19	0.234	0.322	0.238	0.264667		15.35	78.273	16.0671	46.0482	98.2275	10	4.6	1.19	0.264667
PH6%	4	3	111	12.05	25.93	32.39	23.1	11.25	36.55	48.2	6.4	2.4	12	1.01	0.203	0.221	0.199	0.207667		13.85	27.71	34.34	25.45	13.1	32.95	47.94	6.98	40.445	4	12	1.21	0.226	0.312	0.224	0.254		13.85	80.6931	17.258	51.4735	100.236	12	4	1.21	0.254
PH6%	4	3	112	12.44	25.96	32.8	22.58	12.3	32.6	44.27	6.7	3.12	13	1.18	0.214	0.262	0.179	0.218333		13.1	27.06	32.78	25.34	11.1	34.2	47.57	5.85	40.885	3.85	13	1.12	0.236	0.288	0.228	0.250667		13.1	82.5503	14.3084	43.8043	95.5018	13	3.85	1.12	0.250667
PH6%	4	3	113	13.32	26.23	35.64	24.75	12.05	36.2	48.9	6.05	3.55	13	0.96	0.221	0.278	0.21	0.236333		15.1	28.1	34.67	26.72	13.3	42.6	52.71	6.1	47.655	4.7	11	1.1	0.213	0.313	0.221	0.249		15.1	81.0499	12.8003	49.7754	95.5609	11	4.7	1.1	0.249
PH6%	4	3	114	11.85	25.72	32.15	22.28	9.18	31.27	43.74	5.75	2.79	12	1.39	0.205	0.19	0.189	0.194667		13	26.63	33.36	24.82	11.85	40.5	51.2	5.6	45.85	3.8	12	1.09	0.235	0.236	0.23	0.233667		13	79.8261	12.2137	47.7438	94.3423	12	3.8	1.09	0.233667
PH6%	4	3	115	11.7	26.15	32.44	23.12	9.55	35.1	45.77	5.2	2.9	12	1.18	0.206	0.322	0.182	0.236667		14.1	27.35	34.9	26.2	13.4	34.66	55.3	6.45	44.98	4.5	11	1.18	0.217	0.317	0.226	0.253333		14.1	78.3668	14.3397	51.145	97.7475	11	4.5	1.18	0.253333
PH6%	4	3	116	10.87	25.23	30.93	22.55	8.45	29.15	44.5	5.1	2.8	13	1.05	0.232	0.249	0.166	0.215667		13.6	27.3	33.65	23.86	13.8	39.47	46.15	6.9	42.81	4.49	12	1.16	0.212	0.318	0.215	0.248333		13.6	81.1293	16.1177	57.8374	100.02	12	4.49	1.16	0.248333
PH6%	4	3	117	12.6	25.35	34.12	24.9	9.17	32.95	43.5	6	3.12	13	0.86	0.244	0.259	0.221	0.241333		14.48	27.67	35.45	24.18	10.1	38.15	54.2	6.4	46.175	4.5	12	1.07	0.228	0.287	0.216	0.243667		14.48	78.0536	13.8603	41.7701	97.312	12	4.5	1.07	0.243667
PH6%	4	3	118	11.88	25.7	32.94	25.1	8.55	38.37	52.2	5.02	3.05	12	0.86	0.219	0.214	0.21	0.214333		14.85	27.96	34.34	27.89	13.23	43.49	50.04	6.27	46.765	4.7	12	1.2	0.2	0.29	0.203	0.231		14.85	81.4211	13.4075	47.4364	96.5058	12	4.7	1.2	0.231
PH6%	4	3	119	9.75	23.57	28.45	19.2	11.5	36.36	43.96	5.1	2.74	11	1.02	0.196	0.318	0.214	0.242667		14.5	27.45	35.12	26.12	13.4	38.43	50.72	5.87	44.575	4.35	11	1.22	0.2	0.277	0.222	0.233		14.5	78.1606	13.1688	51.3017	94.78	11	4.35	1.22	0.233
PH6%	4	3	120																	15.45	28.27	35.7	27.34	12.55	46.02	55.2	5.98	50.61	4.8	12	1.17	0.208	0.34	0.228	0.258667		15.45	79.1877	11.8158	45.9034	94.7867	12	4.8	1.17	0.258667

## Sheet: Egg Traits 3
Egg Traits				G
Group	Group	Replicate	Number	Egg Weight	Shape Index	Egg Weight Index	Yellow Index	Haugh Unit	Yellow Color	Yellow Weight	Shell Weight	Shell Thickness
Control	1	1	1	12.87	78.8271	14.9826	47.955	98.4295	8	3.93	1.27	0.238
Control	1	1	2	13.14	76.8516	12.759	46.2451	93.657	8	4.75	0.96	0.249667
Control	1	1	3	14.93	79.7986	12.5645	47.7528	97.3025	8	4.58	1.24	0.248667
Control	1	1	4	13.87	81.7023	17.5964	48.0626	101.795	9	4.14	1.48	0.27
Control	1	1	5	13.54	75.9084	18.2135	50.2041	99.6158	8	3.99	1.23	0.276667
Control	1	1	6	12.8	75.4179	16.9834	51.54	101.509	8	3.5	1.18	0.243333
Control	1	1	7	12.72	81.8845	18.6254	47.7624	101.342	8	3.71	1.23	0.231333
Control	1	1	8	14.72	73.4417	17.9821	47.4823	101.795	8	4.7	1.35	0.246667
Control	1	1	9	13.21	78.4818	12.6871	50.9133	94.608	8	4.45	1.43	0.272
Control	1	1	10	10.89	81.9265	18.7787	50.9788	100.89	8	3.55	1.17	0.238667
Control	1	2	11	13.27	80.3434	14.6906	46.1509	97.7496	8	4.06	1.16	0.245
Control	1	2	12	13.18	77.8892	14.5463	45.8568	98.1191	8	4.5	1.35	0.256333
Control	1	2	13	13.15	77.7094	12.0812	46.2432	95.9512	8	4.1	1.13	0.217667
Control	1	2	14	13.14	75.888	11.9937	45.7614	94.7488	8	4.1	1.09	0.217
Control	1	2	15	12.89	78.9318	12.99	48.5493	94.9016	8	4.45	1.14	0.226333
Control	1	2	16	16.11	75.7909	14.7391	48.0505	98.2083	8	4.68	1.36	0.246667
Control	1	2	17	13.17	79.7037	15.2847	49.004	96.7426	9	4.18	1.21	0.256667
Control	1	2	18	13.31	79.0739	17.9905	44.4846	104.494	9	4.19	1.14	0.236
Control	1	2	19	16.4	75.4339	15.9208	48.3395	104.077	8	4.58	1.25	0.239
Control	1	2	20	10.49	71.1406	10.1951	44.0991	90.4913	8	3.3	1.09	0.252667
Control	1	3	21	14.9	78.5795	13.4868	49.6145	96.1953	8	4.51	1.26	0.214333
Control	1	3	22	14.8	76.0828	14.396	51.5813	100.999	8	4.4	1.24	0.200333
Control	1	3	23	12.3	81.1043	13.056	41.4922	96.2254	9	3.98	0.96	0.235
Control	1	3	24	14.4	78.5653	14.9184	51.9912	97.1238	8	4.45	1.35	0.275
Control	1	3	25	14.13	76.2942	19.036	44.7875	103.507	8	4.61	1.28	0.281667
Control	1	3	26	14.71	79.3469	14.9018	51.1284	99.7958	9	4.37	1.22	0.235
Control	1	3	27	13.45	77.0568	17.9134	48.2072	101.965	9	4.2	1.21	0.285
Control	1	3	28	14.23	80.6452	14.4106	51.7966	96.0432	8	3.98	1.15	0.278333
Control	1	3	29	13.5	78.1924	13.6733	46.3976	95.8889	9	3.98	1.28	0.269667
Control	1	3	30	14.6	74.9035	13.9549	40.0794	98.8374	8	5.3	1.3	0.256333
PH 2%	2	1	31	13.41	79.3617	21.6816	45.8105	105.068	9	5	1.24	0.268333
PH 2%	2	1	32	15.15	68.6122	12.5862	46.7238	93.8154	9	4.65	1.29	0.292667
PH 2%	2	1	33	13.9	81.4454	13.1274	51.4627	95.5131	9	5.02	1.12	0.239667
PH 2%	2	1	34	14.94	78.2878	15.2439	43.8628	97.5277	8	4.33	1.18	0.242
PH 2%	2	1	35	15.33	78.7234	17.8082	43.1882	102.948	9	5.15	1.38	0.233667
PH 2%	2	1	36	12.05	79.1111	14.5268	49.9397	99.1232	10	3.5	1.24	0.231333
PH 2%	2	1	37	14.8	77.404	15.3132	43.3001	98.0581	10	4.8	1.14	0.233
PH 2%	2	1	38	12.99	78.7843	15.2776	51.38	99.4748	9	3.71	1.09	0.211667
PH 2%	2	1	39	13.7	79.0739	15.942	50.7087	98.6436	10	4.05	1.25	0.225
PH 2%	2	1	40	13.7	81.3559	17.2883	51.2615	101.672	10	3.94	1.22	0.218
PH 2%	2	2	41	14.64	82.8428	15.5025	43.6131	99.8312	10	4.9	1.3	0.236
PH 2%	2	2	42	14.74	78.9697	14.2563	49.1296	97.9986	10	4.45	1.21	0.267667
PH 2%	2	2	43	14.52	80.8953	12.6461	49.0413	95.1588	10	4.5	1.22	0.239
PH 2%	2	2	44	13.22	79.2364	14.0366	45.2675	98.0058	10	4.1	1.26	0.283333
PH 2%	2	2	45	13.3	78.0059	17.1514	53.5773	100.179	10	3.9	1.14	0.269
PH 2%	2	2	46	13.03	86.7698	17.1787	52.9555	100.108	9	3.94	1.08	0.265
PH 2%	2	2	47	15	78.5835	14.782	50.9893	97.5421	10	4.6	0.24	0.270333
PH 2%	2	2	48	13.55	75.0421	13.4016	45.7863	96.6644	10	4.65	1.13	0.248333
PH 2%	2	2	49	13.56	77.7778	17.0383	47.4708	101.576	10	4.2	1.12	0.237333
PH 2%	2	2	50	13.6	80.924	13.9627	41.6058	95.8785	10	4.48	1.12	0.239333
PH 2%	2	3	51	13.6	81.1394	12.8273	51.2215	94.8639	9	4	1.22	0.268667
PH 2%	2	3	52	15.7	77.2529	16.8626	49.6416	99.8301	10	4.5	1.24	0.253667
PH 2%	2	3	53	17.89	73.2202	10.4927	43.9957	92.3133	9	5	1.48	0.233667
PH 2%	2	3	54	13.9	80.9243	14.2681	49.693	97.3978	10	4.2	1.25	0.226667
PH 2%	2	3	55	15.78	78.0307	13.3598	46.3469	94.9493	10	4	1.21	0.261333
PH 2%	2	3	56	13.8	78.4002	12.8302	47.1028	95.5709	10	4.4	1.32	0.25
PH 2%	2	3	57	13.69	78.817	14.4962	51.7131	96.5846	10	5.29	1.23	0.243333
PH 2%	2	3	58	14.15	73.3209	11.6246	47.7159	89.865	9	4.6	1.14	0.259667
PH 2%	2	3	59	15.43	78.7169	15.1532	49.0421	98.1868	9	4	1.18	0.256
PH 2%	2	3	60	13.55	77.0398	12.7361	44.4633	95.4759	14	6.1	0.98	0.179333
PH 4%	3	1	61	14.88	82.1181	18.4963	53.9799	102.749	10	4.2	1.22	0.238
PH4%	3	1	62	14.85	81.9872	17.2557	52.6316	100.89	10	4	1.18	0.226333
PH4%	3	1	63	12.75	76.8254	17.1421	48.0958	99.6073	10	3.5	1.18	0.205667
PH4%	3	1	64	12.3	80.0062	17.6738	48.1436	100.292	9	3.4	1.25	0.276667
PH4%	3	1	65	12.7	78.7437	17.0189	50.9719	97.3881	12	3.35	1.02	0.237
PH4%	3	1	66	14.8	82.8697	16.0891	44.1229	97.6015	10	4.85	1.16	0.259667
PH4%	3	1	67	13	82.8264	20.0739	52.8421	105.417	11	3.4	1.15	0.220667
PH4%	3	1	68	14.5	83.3828	15.2356	52.7897	97.5316	11	4.7	1.08	0.247333
PH4%	3	1	69	13.25	82.1675	18.4542	48.1002	103.533	10	3.63	1.15	0.222
PH4%	3	1	70	11.7	78.8503	17.1498	50.1715	101.897	9	3.3	0.92	0.251
PH4%	3	2	71	14.77	84.5041	14.1609	44.5455	97.1562	11	4.8	1.2	0.246333
PH4%	3	2	72	14.2	81.5805	16.1095	45.781	99.1347	9	5.3	1.26	0.231
PH4%	3	2	73	13.25	78.4728	11.4039	42.3303	95.1701	8	3.78	1.19	0.232667
PH4%	3	2	74	12	79.4225	10.0418	46.6801	90.8844	12	4.05	1.09	0.291667
PH4%	3	2	75	16.11	82.4935	12.4948	40.473	94.2793	10	4	1.18	0.257
PH4%	3	2	76	14.2	78.6099	17.4662	48.381	100.573	9	4	1.25	0.232667
PH4%	3	2	77	15.92	78.2509	15.9823	47.1593	98.6174	10	4.15	1.26	0.256
PH4%	3	2	78	12.73	76.5519	12.7991	38.3189	95.243	10	4.25	1.1	0.242
PH4%	3	2	79	13.9	81.3475	16.4461	52.9008	100.382	10	4.6	1.02	0.257667
PH4%	3	2	80	12.22	79.5851	14.4654	47.619	100.766	12	4.11	1.09	0.260667
PH4%	3	3	81	15.16	80.6627	15.34	51.8433	99.1295	10	4.8	1.4	0.248667
PH4%	3	3	82	15.7	77.6951	14.8758	45.5872	97.1321	10	4.4	1.29	0.296
PH4%	3	3	83	12.1	81.1915	16.2395	45.8126	100.318	10	4.1	1.02	0.279667
PH4%	3	3	84	16.4	79.5896	15.3723	47.0711	97.7007	11	5.2	1.17	0.249333
PH4%	3	3	85	13.3	79.4205	14.6429	52.1976	98.4137	10	4	1.11	0.253333
PH4%	3	3	86	14.5	79.7382	14.4761	45.709	98.0798	10	4.6	1.1	0.231333
PH4%	3	3	87	14.8	81.104	16.5365	55.2147	100.701	11	4.01	1.33	0.272
PH4%	3	3	88	15.6	79.7171	17.0774	51.4956	101.377	10	4.8	1.24	0.245667
PH4%	3	3	89	13.8	81.6369	14.7729	47.5029	97.0367	10	4.3	1.01	0.251333
PH4%	3	3	90	12.05	81.8182	18.3364	51.38	99.4763	11	3.3	1.14	0.247
PH 6%	4	1	91	14.1	74.8258	16.9694	49.6333	100.623	11	3.8	1.33	0.264333
PH6%	4	1	92	12.82	79.7006	14.8008	42.1488	95.6704	10	3.35	1.36	0.255
PH6%	4	1	93	13.6	78.5095	13.9312	53.1062	97.7935	11	3.65	1.16	0.247
PH6%	4	1	94	15.1	79.0113	19.4692	46.6994	102.81	11	4.6	1.38	0.234667
PH6%	4	1	95	13.85	79.8012	14.3982	51.08	98.4726	11	3.98	1.18	0.262333
PH6%	4	1	96	13.35	76.7581	10.1598	44.4444	90.8226	11	4.2	1.2	0.255333
PH6%	4	1	97	13.2	81.4804	16.1455	49.8369	98.3792	11	3.86	1.22	0.255667
PH6%	4	1	98	14.1	70.6183	12.381	49.9006	94.9125	10	4.15	1.15	0.231
PH6%	4	1	99	13.1	77.3126	15.5789	45.8045	100.843	11	4.1	1.14	0.273333
PH6%	4	1	100	13.5	73.8049	10.4798	45.7883	91.4703	11	4.3	1.19	0.246667
PH6%	4	2	101	15.23	81.2052	15.297	51.9841	98.9611	11	4.35	1.18	0.267
PH6%	4	2	102	13.28	79.6039	13.3126	50.4202	96.0175	13	4.7	1.24	0.259667
PH6%	4	2	103	12.8	78.0328	14.1819	43.4524	96.1595	13	3.65	1.08	0.227
PH6%	4	2	104	13.6	79.6779	15.0524	50.2582	96.4006	12	3.99	1.11	0.276333
PH6%	4	2	105	13.2	77.0029	13.5349	45	95.297	12	4.5	1.21	0.277667
PH6%	4	2	106	12.7	77.8535	14.8971	43.4699	97.8469	11	4.1	1.17	0.260667
PH6%	4	2	107	15.4	78.4401	15.1089	51.3306	97.0554	12	4.4	1.24	0.265667
PH6%	4	2	108	14.7	78.2981	15.6216	49.0916	100.321	11	4.11	1.13	0.251
PH6%	4	2	109	13.1	75.4663	13.2337	46.2077	97.1558	12	4.2	1.22	0.243667
PH6%	4	2	110	15.35	78.273	16.0671	46.0482	98.2275	10	4.6	1.19	0.264667
PH6%	4	3	111	13.85	80.6931	17.258	51.4735	100.236	12	4	1.21	0.254
PH6%	4	3	112	13.1	82.5503	14.3084	43.8043	95.5018	13	3.85	1.12	0.250667
PH6%	4	3	113	15.1	81.0499	12.8003	49.7754	95.5609	11	4.7	1.1	0.249
PH6%	4	3	114	13	79.8261	12.2137	47.7438	94.3423	12	3.8	1.09	0.233667
PH6%	4	3	115	14.1	78.3668	14.3397	51.145	97.7475	11	4.5	1.18	0.253333
PH6%	4	3	116	13.6	81.1293	16.1177	57.8374	100.02	12	4.49	1.16	0.248333
PH6%	4	3	117	14.48	78.0536	13.8603	41.7701	97.312	12	4.5	1.07	0.243667
PH6%	4	3	118	14.85	81.4211	13.4075	47.4364	96.5058	12	4.7	1.2	0.231
PH6%	4	3	119	14.5	78.1606	13.1688	51.3017	94.78	11	4.35	1.22	0.233
PH6%	4	3	120	15.45	79.1877	11.8158	45.9034	94.7867	12	4.8	1.17	0.258667

## Sheet: Egg Performance 1
Daily Egg Performance			Deneme	Start
			Dışı	Week 7							No Shell	Broken	Week 7	Week 8									Week 8	Week 9									Week 9	Week 10									Week 10	Week 11
Group	Group	Number of Birds	25,11.21	26,11.21	27,11.21	28,11.21	29,11.21	30,11.21	01,12.21	2,12.21			Total	03,12.21	04,12.21	05,12.21	06,12.21	07,12.21	08,12.21	9,12.21	No Shell	Broken	Total	10,12.21	11,12.21	12,12.21	13,12.21	14,12.21	15,12.21	16,12.21	No Shell	Broken	Total	17,12.21	18,12.21	19,12.21	20,12.21	21,12.21	22,12.21	23,12.21	No Shell	Broken	Total	24,12.21	25,12.21	26,12.21	27,12.21	28,12.21	29,12.21
C1	1	8		1	4	2	3	4	3	5	2		24	6	5	7	5	7	5	8	2	3	48	5	8	5	7	7	8	8		1	49	5	6	7	5	5	7	7			42	7	7	8	8	8	5
2	1	8	1		3	4	3	3	2	2	2		19	5	8	8	4	3	6	7	1	1	43	8	8	8	7	7	6	8		1	53	8	8	8	6	7	7	8			52	6	6	7	8	7	6
3	1	8		1	1	1	2	2	3	5		1	16	4	7	6	2	3	2	7	1	3	35	7	7	6	8	7	8	8			51	7	7	8	5	7	8	8			50	7	8	8	8	5	6
PH2%	2	8			3		3	3	2	3	2	1	17	4	6	5	4	2	4	6	2	1	34	5	7	6	8	7	8	8		1	50	6	7	6	4	5	6	7	2		43	8	7	7	8	6	7
2	2	8	1			4			3	3		1	11	2	6	6	5	2	3	6			30	5	8	5	7	6	7	7			45	5	7	6	4	6	7	6			41	7	6	7	7	7	6
3	2	8					1		3	6			10	6	8	5	7	3	7	5	3	2	46	5	7	2	6	5	7	7		2	41	6	8	6	3	6	7	6			42	6	6	7	7	7	5
PH4%	3	8		2	2	2	5	3	4	3		1	22	5	6	8	7	2	7	8	1	1	45	8	7	8	8	8	8	8			55	7	7	8	5	6	4	7	1		45	8	7	8	8	8	6
2	3	8	2		2	2	2	5	3	5			19	3	5	5	6	2	4	6	3	2	36	7	7	7	6	8	8	8			51	6	7	7	5	5	7	8			45	8	6	7	8	7	8
3	3	8		1	3	2	1	3	3	3			16	5	8	4	7	3	5	8	2	2	44	6	8	8	6	8	8	8	1	1	54	7	8	8	5	7	6	8	1	1	51	8	8	8	7	8	6
PH6%	4	8			1	2	1	2	2	2			10	4	4	5	3	2	6	8	2	1	35	8	8	7	8	8	6	8			53	6	7	8	3	5	6	6		2	43	6	8	8	8	7	7
2	4	8					1	3	1	2			7	4	3	4	3	7	1	6	2	2	32	8	8	6	8	5	8	8	1		52	7	8	8	5	6	8	8			50	5	7	8	8	6	7
3	4	8			1	1	1	1	5	1	1	1	12	6	8	7	7	3	7	8		2	48	7	8	8	8	8	8	8		1	56	8	8	8	6	6	8	8			52	6	8	7	7	8	7
[truncated: 4 more columns]

## Sheet: Egg Performance 2
Daily Egg Performance
Week	Date	Number of Birds	C1	C2	C3	PH2%-1	PH2%-2	PH2%-3	PH4%-1	PH4%-2	PH4%-3	PH6%-1	PH6%-2	PH6%-3
7	25,11.21	8		1			1			2
	26,11.21	8	1		1				2		1
	27,11.21	8	4	3	1	3			2	2	3	1		1
	28,11.21	8	2	4	1		4		2	2	2	2		1
	29,11.21	8	3	3	2	3		1	5	2	1	1	1	1
	30,11.21	8	4	3	2	3			3	5	3	2	3	1
	01,12.21	8	3	2	3	2	3	3	4	3	3	2	1	5
	No Shell		2	2		2								1
	Broken				1	1	1		1					1
8	02,12.21		5	2	5	3	3	6	3	5	3	2	2	1
	03,12.21		6	5	4	4	2	6	5	3	5	4	4	6
	04,12.21		5	8	7	6	6	8	6	5	8	4	3	8
	05,12.21		7	8	6	5	6	5	8	5	4	5	4	7
	06,12.21		5	4	2	4	5	7	7	6	7	3	3	7
	07,12.21		7	3	3	2	2	3	2	2	3	2	7	3
	08,12.21		5	6	2	4	3	7	7	4	5	6	1	7
	No Shell		2	1	1	2		3	1	3	2	2	2
	Broken		3	1	3	1		2	1	2	2	1	2	2
9	9,12.21		8	7	7	6	6	5	8	6	8	8	6	8
	10,12.21		5	8	7	5	5	5	8	7	6	8	8	7
	11,12.21		8	8	7	7	8	7	7	7	8	8	8	8
	12,12.21		5	8	6	6	5	2	8	7	8	7	6	8
	13,12.21		7	7	8	8	7	6	8	6	6	8	8	8
	14,12.21		7	7	7	7	6	5	8	8	8	8	5	8
	15,12.21		8	6	8	8	7	7	8	8	8	6	8	8
	No Shell										1		1
	Broken		1	1		1		2			1			1
10	16,12.21		8	8	8	8	7	7	8	8	8	8	8	8
	17,12.21		5	8	7	6	5	6	7	6	7	6	7	8
	18,12.21		6	8	7	7	7	8	7	7	8	7	8	8
	19,12.21		7	8	8	6	6	6	8	7	8	8	8	8
	20,12.21		5	6	5	4	4	3	5	5	5	3	5	6
	21,12.21		5	7	7	5	6	6	6	5	7	5	6	6
	22,12.21		7	7	8	6	7	7	4	7	6	6	8	8
	No Shell					2			1		1
	Broken										1	2
11	23,12.21		7	8	8	7	6	6	7	8	8	6	8	8
	24,12.21		7	6	7	8	7	6	8	8	8	6	5	6
	25,12.21		7	6	8	7	6	6	7	6	8	8	7	8
	26,12.21		8	7	8	7	7	7	8	7	8	8	8	7
	27,12.21		8	8	8	8	7	7	8	8	7	8	8	7
	28,12.21		8	7	5	6	7	7	8	7	8	7	6	8
	29,12.21		5	6	6	7	6	5	6	8	6	7	7	7
	30,12.21		7	6	7	8	6	7	8	6	7	6	8	8
	No Shell												1
	Broken			1	1		2		2		2		1

## Sheet: Egg Performance 3
Daily Egg Performance			Out for Trail	Start
				Week7							No Shell	Broken											8. Week	9. Week									9. Week	10. Week									10. Week	11. Week
	Group	Number of Animals	25,11.21	26,11.21	27,11.21	28,11.21	29,11.21	30,11.21	01,12.21	2,12.21			Week 7	Week 8									8. Week	9. Week									9. Week	10. Week									10. Week	11. Week
C1	1	8		1	4	2	3	4	3	5	2		24	6	5	7	5	7	5	8	2	3	48	5	8	5	7	7	8	8		1	49	5	6	7	5	5	7	7			42	7	7	8	8	8	5
2	1	8	1		3	4	3	3	2	2	2		19	5	8	8	4	3	6	7	1	1	43	8	8	8	7	7	6	8		1	53	8	8	8	6	7	7	8			52	6	6	7	8	7	6
3	1	8		1	1	1	2	2	3	5		1	16	4	7	6	2	3	2	7	1	3	35	7	7	6	8	7	8	8			51	7	7	8	5	7	8	8			50	7	8	8	8	5	6
Control													19.6667	5	6.66667	7	3.66667	4.33333	4.33333	7.33333	1.33333	2.33333	42	6.66667	7.66667	6.33333	7.33333	7	7.33333	8	0	1	51	6.66667	7	7.66667	5.33333	6.33333	7.33333	7.66667	0	0	48	6.66667	7	7.66667	8	6.66667	5.66667
PH2%	2	8			3		3	3	2	3	2	1	17	4	6	5	4	2	4	6	2	1	34	5	7	6	8	7	8	8		1	50	6	7	6	4	5	6	7	2		43	8	7	7	8	6	7
2	2	8	1			4			3	3		1	11	2	6	6	5	2	3	6			30	5	8	5	7	6	7	7			45	5	7	6	4	6	7	6			41	7	6	7	7	7	6
3	2	8					1		3	6			10	6	8	5	7	3	7	5	3	2	46	5	7	2	6	5	7	7		2	41	6	8	6	3	6	7	6			42	6	6	7	7	7	5
PH2%													12.6667	4	6.66667	5.33333	5.33333	2.33333	4.66667	5.66667	2.5	1.5	36.6667	5	7.33333	4.33333	7	6	7.33333	7.33333	0	1.5	45.3333	5.66667	7.33333	6	3.66667	5.66667	6.66667	6.33333	2	0	42	7	6.33333	7	7.33333	6.66667	6
PH4%	3	8		2	2	2	5	3	4	3		1	22	5	6	8	7	2	7	8	1	1	45	8	7	8	8	8	8	8			55	7	7	8	5	6	4	7	1		45	8	7	8	8	8	6
2	3	8	2		2	2	2	5	3	5			19	3	5	5	6	2	4	6	3	2	36	7	7	7	6	8	8	8			51	6	7	7	5	5	7	8			45	8	6	7	8	7	8
3	3	8		1	3	2	1	3	3	3			16	5	8	4	7	3	5	8	2	2	44	6	8	8	6	8	8	8	1	1	54	7	8	8	5	7	6	8	1	1	51	8	8	8	7	8	6
PH4%													19	4.33333	6.33333	5.66667	6.66667	2.33333	5.33333	7.33333	2	1.66667	41.6667	7	7.33333	7.66667	6.66667	8	8	8	1	1	53.3333	6.66667	7.33333	7.66667	5	6	5.66667	7.66667	1	1	47	8	7	7.66667	7.66667	7.66667	6.66667
PH6%	4	8			1	2	1	2	2	2			10	4	4	5	3	2	6	8	2	1	35	8	8	7	8	8	6	8			53	6	7	8	3	5	6	6		2	43	6	8	8	8	7	7
2	4	8					1	3	1	2			7	4	3	4	3	7	1	6	2	2	32	8	8	6	8	5	8	8	1		52	7	8	8	5	6	8	8			50	5	7	8	8	6	7
3	4	8			1	1	1	1	5	1	1	1	12	6	8	7	7	3	7	8		2	48	7	8	8	8	8	8	8		1	56	8	8	8	6	6	8	8			52	6	8	7	7	8	7
PH6%													9.66667	4.66667	5	5.33333	4.33333	4	4.66667	7.33333	2	1.66667	38.3333	7.66667	8	7	8	7	7.33333	8	1	1	53.6667	7	7.66667	8	4.66667	5.66667	7.33333	7.33333	0	2	48.3333	5.66667	7.66667	7.66667	7.66667	7	7
				Egg Performance, Number									Egg Performance, %
		Group	Number of Animals	Week7	Week8	Week 9	Week 10	Week 11	Total			Group	Week7	Week8	Week 9	Week 10	Week 11	verage Week 7-11
Control	1	1	8	24	48	49	42	50	213			1	42.8571	85.7143	87.5	75	89.2857	76.0714
	2	1	8	19	43	53	52	47	214			1	33.9286	76.7857	94.6429	92.8571	83.9286	76.4286
	3	1	8	16	35	51	50	50	202			1	28.5714	62.5	91.0714	89.2857	89.2857	72.1429
													35.119	75	91.0714	85.7143	87.5	74.881
PH2%	4	2	8	17	34	50	43	51	195			2	30.3571	60.7143	89.2857	76.7857	91.0714	69.6429
	5	2	8	11	30	45	41	48	175			2	19.6429	53.5714	80.3571	73.2143	85.7143	62.5
	6	2	8	10	46	41	42	45	184			2	17.8571	82.1429	73.2143	75	80.3571	65.7143
													22.619	65.4762	80.9524	75	85.7143	65.9524
PH4%	7	3	8	22	45	55	45	55	222			3	39.2857	80.3571	98.2143	80.3571	98.2143	79.2857
	8	3	8	19	36	51	45	50	201			3	33.9286	64.2857	91.0714	80.3571	89.2857	71.7857
	9	3	8	16	44	54	51	54	219			3	28.5714	78.5714	96.4286	91.0714	96.4286	78.2143
													33.9286	74.4048	95.2381	83.9286	94.6429	76.4286
PH6%	10	4	8	10	35	53	43	50	191			4	17.8571	62.5	94.6429	76.7857	89.2857	68.2143
	11	4	8	7	32	52	50	51	192			4	12.5	57.1429	92.8571	89.2857	91.0714	68.5714
	12	4	8	12	48	56	52	51	219			4	21.4286	85.7143	100	92.8571	91.0714	78.2143
											17.2619	68.4524	95.8333	86.3095	90.4762
[truncated: 4 more columns]

[truncated: 4 more sheets: Egg Performance 4, Egg Feed Consumption 1, Eff Feed Consumption 2, Egg Weight]
